1        **Amyloid Precursor Protein (APP) controls excitatory/inhibitory**  
2        **synaptic inputs by regulating the transcriptional activator Neuronal**  
3        **PAS Domain Protein 4 (NPAS4)**  
4

5 Rémi Opsomer<sup>1</sup>, Sabrina Contino<sup>1†</sup>, Florian Perrin<sup>1,2†</sup>, Bernadette Tasiaux<sup>1</sup>, Pierre Doyen<sup>3</sup>,  
6 Maxime Vergouts<sup>3</sup>, Céline Vrancx<sup>1</sup>, Anna Doshina<sup>1</sup>, Nathalie Pierrot<sup>1</sup>, Jean-Noël Octave<sup>1</sup>, Serena  
7 Stanga<sup>1</sup>, Pascal Kienlen-Campard<sup>1\*</sup>.

8 <sup>1</sup> CEMO-Alzheimer Dementia group, Institute of Neuroscience, Université catholique de Louvain,  
9 Brussels, Belgium.

10 <sup>2</sup> de Duve Institute, Ludwig Institute for Cancer Research and Université catholique de Louvain,  
11 Brussels, Belgium.

12 <sup>3</sup> CEMO-Laboratory of Neuropharmacology, Institute of Neuroscience, Université catholique de  
13 Louvain, Brussels, Belgium.

14 †These authors have contributed equally to this work.

15 \*Correspondence:

16 Pascal Kienlen-Campard  
17 Institute of Neuroscience  
18 IONS-CEMO, Avenue Mounier 53 bte B1.53.02  
19 B-1200 Brussels  
20 Belgium  
21 Phone:        +32 2 764 93 35  
22 Fax :         +32 2 764 54 60  
23 Email: [pascal.kienlen-campard@uclouvain.be](mailto:pascal.kienlen-campard@uclouvain.be)  
24

25 **Running title**

26 APP-dependent NPAS4 expression and GABA production.  
27

28 **Keywords**

29 Alzheimer's disease; APP family proteins; Neuronal differentiation; Transcriptome analysis;  
30 NPAS4; CRISPR-Cas9; Inhibitory neurotransmission.  
31  
32

33 **Abstract**

34 Sequential proteolysis of the amyloid precursor protein (APP) and amyloid- $\beta$  peptide (A $\beta$ ) release  
35 is an upstream event in Alzheimer's disease (AD) pathogenesis. The function of APP in neuronal  
36 physiology is still, however, poorly understood. Along with its paralog APP-like Proteins 1 and 2  
37 (APLP1-2), APP is involved in neurite formation and synaptic function by mechanisms that are  
38 not elucidated. APP is a single-pass transmembrane protein expressed at high levels in the brain  
39 that resembles a cell adhesion molecule or a membrane receptor, suggesting that its function relies  
40 on cell interaction processes and/or activation of intracellular pathways of signal transduction.  
41 Along this line, the APP intracellular domain (AICD) was reported to act as a transcriptional factor  
42 for targeted gene activation that mediates physiological APP functions. Here, we used an unbiased  
43 transcriptome-based approach to identify the genes transcriptionally regulated by APP in the rodent  
44 embryonic cortex and upon maturation of primary cortical neurons. The transcriptome analysis did  
45 not detect any significant differences in expression of previously proposed AICD target genes. The  
46 overall transcriptional changes were subtle, but we found that genes clustered in neuronal-activity  
47 dependent pathways are dysregulated in the absence of APP. Among these genes, we found the  
48 activity-dependent Neuronal PAS domain protein 4 (NPAS4) Immediate Early Gene to be  
49 downregulated in the absence of APP. Down-regulation of NPAS4 in APP knock-out (KO) neurons  
50 is not related to AICD but to the APP ectodomain. We studied the effect of APP deficiency on  
51 GABAergic and glutamatergic transmission, and found an increased production of the inhibitory  
52 neurotransmitter GABA in APP KO neurons, along with a reduced expression of the GABA(A)  
53 receptors alpha1, suggesting an impaired GABAergic neurotransmission in the absence of APP.  
54 CRISPR-Cas-mediated silencing of NPAS4 in neurons led to similar observations. Altogether, our  
55 results point out a new role for APP in the regulation of excitatory/inhibitory neurotransmission  
56 through the regulation of the activity-dependent NPAS4 gene.

## 57 **Introduction**

58 The Amyloid Precursor Protein (APP) has been extensively studied as the precursor of the amyloid-  
59  $\beta$  peptide (A $\beta$ ), the major component of the senile plaques which are a typical hallmark of  
60 Alzheimer's disease (AD). Still, the physiological functions of APP *per se* have been largely  
61 overlooked and remain a matter of controversy. Understanding the physiological function of APP  
62 and how its deregulation would contribute to AD pathogenesis is thus of prime interest.

63 APP is a type 1 transmembrane protein that belongs to the APP-like protein family (APLP1 and  
64 APLP2, referred to as APLPs), which are present in most of the species, excepted in yeast,  
65 prokaryotes and plants. The APLP family has been generated by several duplications and  
66 contraction events during evolution. The specific physiological role and/or redundant functions  
67 assigned to each member are yet not clearly defined (for a review see Shariati and De Strooper,  
68 2013). APP<sup>-/-</sup> mice show a subtle phenotype, with reduced body and brain weight, reduced  
69 locomotor activity, gliosis, mild axonal growth/white matter defects and altered long-term  
70 potentiation responses (Guo et al., 2012; Muller et al., 2012; Muller and Zheng, 2012). In this broad  
71 (and complex) picture, growing evidence indicate that APP controls neuronal proliferation,  
72 differentiation (Freude et al., 2011; Hu et al., 2013) and migration during embryogenesis (Young-  
73 Pearse et al., 2007). APP contributes to the establishment of a functional neuronal network by  
74 promoting neurite outgrowth (Hoe et al., 2009b). Additionally, APP was reported to control  
75 synaptic formation and activity (Priller et al., 2006; Santos et al., 2009; Lee et al., 2010; Pierrot et  
76 al., 2013; Klevanski et al., 2015; Zou et al., 2016) in the central nervous system (CNS) and at the  
77 neuromuscular junction (Stanga et al., 2016). APP directly modulates the excitatory  
78 neurotransmission by interacting with AMPA (Lee et al., 2010) or NMDA (Cousins et al., 2009;  
79 Hoe et al., 2009a) receptors. APP was also described to play an important role in GABAergic  
80 inhibitory neurotransmission. APP deficiency reduces paired pulse depression (PPD) in mice  
81 (Seabrook et al., 1999) and affects GABA receptors expressions (Fitzjohn et al., 2000; Chen et al.,  
82 2017), while APP overexpression induces hyperexcitability due to GABAergic neurotransmission  
83 failure (Born et al., 2014). Recently, APP was associated with the GABA excitatory/inhibitory shift  
84 occurring in embryonic neurons (Doshina et al., 2017). APP appears therefore to have a direct role  
85 in the fine-tuning of excitatory and inhibitory neurotransmission, a process that seems to be also  
86 critical in AD pathogenesis.

87 Tuning inhibitory/excitatory neurotransmission is very important for neuronal plasticity and  
88 memory formation. This is regulated by a specific subset of genes induced by neuronal activity,  
89 belonging to the Immediate Early Genes (IEGs) family, which control the mechanisms that  
90 “reshape” synaptic inputs on neurons (West and Greenberg, 2011). IEGs expression is instrumental  
91 to neuronal plasticity and memory formation (Alberini, 2009; Loebrich and Nedivi, 2009; Leslie  
92 and Nedivi, 2011). Among these IEGs, NPAS4 is specifically involved in a transcriptional program  
93 that regulates neuronal firing responses to excitatory transmission by enhancing inhibition (Lin et  
94 al., 2008), therefore keeping neuronal firing in response to stimuli within normal levels (Spiegel et  
95 al., 2014). Elevated activity of inhibitory neurons also induces NPAS4, promoting increased

96 excitation onto the same neurons (Spiegel et al., 2014). NPAS4 is therefore a key player in the  
97 maintenance of excitatory/inhibitory balance in neuronal network.

98 The precise mechanisms underlying APP synaptic functions are still elusive. One could suspect  
99 APP to regulate the expression of genes involved in synaptic activity, or to shape the structure of  
100 the synapse. APP was shown to control gene expression through its intracellular domain called  
101 AICD. An increasing list of AICD candidate genes has emerged from various models (reviewed in  
102 Pardossi-Piquard and Checler, 2012). Some of these candidate genes failed to be confirmed by  
103 transcription analysis in APP-deficient cell lines (Hebert et al., 2006; Waldron et al., 2008), and  
104 APP was also reported to regulate gene transcription independently of AICD release (Hicks et al.,  
105 2013; Pierrot et al., 2013). It is so far impossible to clearly define (i) the precise identity of APP  
106 target genes in neurons (ii) how these APP target genes relate to APP neuronal function (iii) the  
107 mechanism involved in APP-dependent in gene transcription.

108 In the present study, we first aimed at identifying genes transcriptionally regulated by APP in  
109 primary neurons. To that end, we performed a non-biased transcriptome analysis of APP<sup>+/+</sup> and  
110 APP<sup>-/-</sup> primary cortical neurons at different stage of differentiation. In-depth transcriptome  
111 analysis revealed that the absence of APP induced only subtle changes in global gene expression.  
112 The hitherto described AICD target genes were not significantly up-or down-regulated in our  
113 model. A more detailed analysis indicates that expression of genes clustered in specific neuronal  
114 pathways was affected by the absence of APP. In particular, the transcription of the activity-  
115 dependent transcription factor *Npas4* gene was down-regulated in the absence of APP after 7  
116 days of culture. Interestingly, we observed that the amount of the inhibitory neurotransmitter  $\gamma$ -  
117 aminobutyric acid (GABA) and the expression of glutamate decarboxylase 65 (GAD65), the  
118 enzyme that catalyzes the decarboxylation of [glutamate](#) to [GABA](#), were increased in APP<sup>-/-</sup>  
119 neurons, suggesting that the inhibitory inputs in synaptic transmission are increased in APP KO  
120 neurons. Direct down-regulation of *Npas4* by CRISPR-Cas9 editing in neurons mimicked the  
121 increase in GAD65 and GABA release observed in APP<sup>-/-</sup> cultures. Altogether, our data give a  
122 new in APP-dependent neuronal activity, supporting that APP tunes the excitatory/inhibitory  
123 transmission in neuronal networks.

## 124 **Materials and Methods**

### 125 *Antibodies, chemicals and reagents*

126 All media and reagents used for cell cultures were purchased from Thermo Fisher Scientific  
127 (Waltham, MA); fetal bovine serum was purchased from Biowest (Nuaille, France). Analytical  
128 grade solvents and salts were purchased from Sigma-Aldrich (St-Louis, MO). N-[N-(3,5-  
129 Difluorophenacetyl)-L-alanyl]-S-phenylglycine t-butyl ester (DAPT), sAPP $\alpha$  (S9564) and DAPI  
130 (D9542) were from Sigma-Aldrich (St-Louis, MO, USA). Triton-X100 was purchased from Merck  
131 (Darmstadt, Germany) and TriPure Isolation Reagent from Roche (Basel, Switzerland). Microarray  
132 analysis kits were from Affymetrix (Santa Clara, CA, USA). All reagents for RNA processing or  
133 cDNA synthesis were purchased from Bio-Rad (Hercules, CA). Primers were purchased from  
134 Sigma-Aldrich (St Louis, MO, USA). Proteins were quantified with BCA Protein Assay kit  
135 (Thermo Fisher Scientific, Waltham, MA). NuPAGE $\text{\textcircled{R}}$  reagents were from Invitrogen (Carlsbad,  
136 CA). PVDF and nitrocellulose membranes were from Merck Millipore (Billerica, MA,) or  
137 Amersham $\text{\textsuperscript{TM}}$  (Little Chalfont, UK). Nonfat dry milk was from Merck (Darmstadt, Germany).  
138 Western Lighting $\text{\textcircled{R}}$  Plus-ECL reagents were from PerkinElmer (Waltham, MA) and Fluorep  
139 mounting medium was from bioMérieux (Marcy l'Etoile, France). Lentivirus were prepared with  
140 Acrodisc $\text{\textcircled{R}}$  0,45 $\mu\text{m}$  filters (Pall, NYC, USA) and LentiX $\text{\textsuperscript{TM}}$  Concentrator reagent (Clontech,  
141 Mountain View, CA). The following antibodies were used: APP NT (22C11, MAB348, Merck  
142 Millipore, Billerica, MA), anti-human APP (WO2, MABN10, Merck Millipore, Billerica, MA),  
143 anti-APP CT (Y188, Abcam, Cambridge, UK), anti-APLP1 (Cat. No. 171615, Calbiochem EMD  
144 Biosciences – Merck, Darmstadt, Germany), anti-APLP2 (Cat. No. 171616, Calbiochem EMD  
145 Biosciences – Merck, Darmstadt, Germany), anti-GAPDH (14C10, Cell Signaling, Danvers, MA,  
146 USA), anti-MAP2 (M4403, Sigma-Aldrich St Louis, MO), anti-GAD65 (D5G2, Cell Signaling),  
147 anti-mouse IgG, HRP Whole antibody (NA931-1ML, Amersham, Little Chalfont, UK), anti-rabbit  
148 IgG, HRP Whole antibody (NA934-1ML, Amersham, Little Chalfont, UK), goat anti-mouse Alexa  
149 Fluor $\text{\textcircled{R}}$ -488, goat anti-mouse Alexa Fluor $\text{\textcircled{R}}$ -568, goat anti-rabbit Alexa Fluor $\text{\textcircled{R}}$ -647 and DAPI  
150 were purchased from ThermoFisher Scientific (Waltham, MA, USA). Glutamate assay kit was  
151 from Abcam (Cambridge, UK) and  $\gamma$ -aminobutyric acid (GABA) ELISA was purchased from  
152 Cloud-Clone Corporation. 70 $\mu\text{m}$  Falcon $\text{\textsuperscript{TM}}$  Cell Stainers were from ThermoFisher Scientific  
153 (Waltham, MA).

### 154 *Animal models*

155 APP $\text{\textsuperscript{+/+}}$  and APP $\text{\textsuperscript{-/-}}$  mice were obtained from the Jackson Laboratory (Bar, Harbor, ME, USA) as  
156 C57Bl6/J and backcrossed for > 6 generations in CD1 genetic background. Animals were housed  
157 on a 12 h light/dark cycle in standard animal care facility with access to food and water *ad libidum*.  
158 Heterozygous animals (APP $\text{\textsuperscript{+/-}}$ ) were bred and crossed to obtain embryos from the three different  
159 genotypes (APP $\text{\textsuperscript{+/+}}$ , APP $\text{\textsuperscript{+/-}}$  and APP $\text{\textsuperscript{-/-}}$ ) in the same litter. All experiments were performed in  
160 compliance with protocols approved by the UClouvain Ethical Committee for Animal Welfare  
161 (code number 2016/UCL/MD/015).

162 ***Primary neurons culture and treatments***

163 Primary cultures of cortical neurons were prepared from E18 mouse embryos as previously  
164 described (Pierrot et al., 2013). Briefly, cortices were dissected and dissociated in HBSS without  
165 calcium and magnesium and the mixture was centrifuged on Fetal Bovine Serum (FBS) for 10 min  
166 at 1000xg to pellet cells. Cells were plated at 200.000 cells/cm<sup>2</sup> in culture dishes pre-treated with  
167 10 µg/ml of poly-L-lysine in phosphate buffered saline (PBS) and cultured for 3 to 14 days *in vitro*  
168 in Neurobasal® medium enriched with 2% v/v B-27® supplement medium and 1mM L-glutamine  
169 at 37°C, 5% CO<sub>2</sub> and humidified atmosphere. Half of the medium was renewed every 2-3 days.

170 After 6 days (DIV6), neurons were treated for 16h with 1µM of N-[N-(3,5-Difluorophenacetyl)-L-  
171 alanyl]-S-phenylglycine t-butyl ester (DAPT), a  $\gamma$ -secretase inhibitor (Dovey et al., 2001) or with  
172 20 nM of soluble APP alpha in Neurobasal® Medium

173 ***Primary astrocytes culture and treatments***

174 Cortices from rat pups were collected at postnatal day 2 and mechanically dissociated. Astrocytes  
175 were isolated using a 30% Percoll gradient and seeded into gelatin-coated tissue culture flasks.  
176 Cells were left to proliferate for 14 days at 37°C - 5% CO<sub>2</sub> in DMEM-glutaMAX medium  
177 supplemented with 10% FBS, 50 mg/ml penicillin–streptomycin and 50 mg/ml fungizone. Medium  
178 was renewed after 7 days, cells were passaged after 14 days and further cultured in DMEM-  
179 glutaMAX with 10% FBS. Two days later, FBS was reduced to 3% and medium was supplemented  
180 with the growth factor cocktail G5. All experiments were conducted 7 days later (DIV7).

181 ***Npas4 induction analysis***

182 For Npas4 induction analysis, neurons and astrocytes at DIV7 were depolarized with 50mM  
183 potassium chloride. Cell lysates were analyzed by Western blotting with the anti-Npas4 antibody.  
184 as described below.

185 ***RNA extraction, transcriptome analysis and qRT-PCR***

186 Total RNA was extracted by TriPure Isolation Reagent according to the manufacturer's protocol.  
187 RNA samples were suspended in DEPC-treated water and RNA concentration was measured (OD  
188 260 nm) on BioSpec-nano spectrophotometer (Shimadzu Biotech). For microarray analysis, RNA  
189 quality was evaluated by capillary electrophoresis using the Agilent 2100 Bioanalyzer instrument  
190 with the Agilent RNA 6000 Nano Kit according to the manufacturer's instructions (Agilent, Santa  
191 Clara, CA). 250 ng of total RNA for each sample was amplified and labeled using GeneChip®WT  
192 PLUS Reagent kit (Affymetrix) before being hybridized on *GeneChip®Mouse Transcriptome 1.0*  
193 *Array*, overnight at 45°C. The chip was washed using an automated protocol on the GeneChip®  
194 Fluidics Station 450 followed by scanning on a GeneChip® Scanner on Affymetrix microarray  
195 platform (de Duve Institute, UCL, Brussels).



196 For quantitative PCR, RNA samples were reversed transcribed using iScript cDNA Synthesis Kit  
197 and real time PCR was performed in an iCycler MyIQ2 multicolor-Real-Time PCR detection  
198 system using iQ SYBR Green supermix kit (Biorad). A standard curve was established for relative  
199 quantification with a fourfold dilution series (from 100 to 0,0097 ng) of a cDNA template mix.  
200 Relative quantification was calculated by the  $2^{\Delta\Delta CT}$  method, and results were normalized first to  
201 *Gapdh* expression and then normalized (percentage or fold) to the control condition. Primers used  
202 are depicted in Table 1 in Supplementary material.

### 203 ***Western blotting***

204 Cells were solubilized and sonicated in lysis buffer (20% Glycerol, 4% SDS, 125 mM Tris-HCl  
205 pH 6.8) containing a cocktail of proteases and phosphatases inhibitors. Mice were euthanized  
206 (Ketamine/Xylazine injection) and brains were dissected after perfusion with ice cold sterile PBS.  
207 Cortices and hippocampi were isolated and quickly frozen in liquid nitrogen until use. Tissues were  
208 crushed using mortar pestle method. For brain protein extraction, samples were homogenized in  
209 RIPA buffer (1% (w/v) NP40, 0.5% (w/v) deoxycholic acid, 0.1% (w/v) SDS, 150 mM NaCl, 1  
210 mM EDTA, 50 mM Tris, pH 7.4) containing proteases and phosphatases inhibitors cocktail (Roche,  
211 Basel, Switzerland). The samples were clarified by centrifugation at 20,000 x g. Protein  
212 concentrations were determined with a BCA kit. Samples were prepared with NuPAGE LDS  
213 sample buffer (4x) and 50 mM DTT and then heated for 10 min at 70°C. 10 to 40 µg of proteins or  
214 22 µl of culture medium were loaded per well for migration followed by transfer onto PVDF or  
215 nitrocellulose membranes. For APP C-terminal fragments blotting, proteins were transferred on  
216 nitrocellulose (0.1 µm). Membranes were blocked in nonfat dry milk (5% in PBS, 0,1% Tween-  
217 20) and immunoblotted with anti-APP NT (22C11, 1/500), anti-APP CT (Y188, 1/500), anti-  
218 APLP1 (1/1000), anti-APLP2 (1/1000) and anti-GAPDH (1/25000). Blots were revealed using  
219 ECL and signal quantification was performed using GelQuant.NET software  
220 (BiochemLabSolutions.com).

### 221 ***ImmunoCytoFluorescence (ICF)***

222 Neurons were grown at 100.000 cells/cm<sup>2</sup> per well on poly-L-lysine coated coverslips. Neurons  
223 were rinsed with PBS and fixed for 15 min in PBS/4% paraformaldehyde. Neurons were washed  
224 again twice in PBS for 5 min and processed as described previously (Decock et al., 2016).  
225 Permeabilization and blocking steps were done in PBS/5% skimmed milk/0.3% Triton-X100  
226 (M3TPBS); antibodies were incubated in PBS/5% skimmed milk/0.1% Triton-X100 (M1TPBS).  
227 Primary antibodies dilutions used: mouse anti-MAP2 (1/1000), rabbit anti-APP (Y188, 1/100) and  
228 rabbit anti-GAD65 (D5G2, 1/100). Secondary antibodies dilutions used: goat anti-mouse Alexa  
229 Fluor®-488 (1/500), goat anti-mouse Alexa Fluor®-568 (1/500) and goat anti-rabbit Alexa  
230 Fluor®-647 (1/500). Images were acquired on Evos FL Auto microscope (Invitrogen) with GFP  
231 (Alexa Fluor®-488 or native GFP), TxRed (Alexa Fluor®-568) and CY5 (Alexa Fluor®-647)  
232 EVOS LED light cubes and analyzed with ImageJ software. For the quantification of signal area,  
233 10X or 20X magnification images were identically thresholded for APP+/+ and APP-/- or Ct and

234 CRISPR-*Npas4*. Area of thresholded images was measured and normalized to the number of cells  
235 counted by DAPI staining. For the quantification of the APP expression intensity, image  
236 acquisition was performed using 40x objective coverslip-corrected (ThermoFischer Scientific,  
237 AMEP4699) in GFP, CY5 (APP) and DAPI channels. A total of 12, 19 and 19 images were  
238 acquired to obtained 33, 46 and 51 neurons in the analysis (Figure 3B) for CRISPR control (Ct),  
239 Oligo2 and Oligo17 respectively. GFP channel images were first 8-bit transformed and thresholded  
240 to highlight only GFP staining. A region of interest (ROI) was delimited around GFP+ neurons in  
241 the GFP channel (green using “wand tool” in imageJ software and transposed to CY5 (APP)  
242 channel (blue). ROI mean intensity is measured using “Analyze” tool of ImageJ software.

### 243 ***AICD and CRISPR/Cas9 lentiviral constructions and production***

244 We used a lentiviral vector-based approach to express AICD in neurons. AICD50 tagged at the c-  
245 terminal part with hemagglutinin (HA) was cloned into pLenti CMV/TO Puro lentiviral vector  
246 (Addgene #17482). pLenti CMV/TO Puro empty is used as control (Ct). We used a lentiviral  
247 vector-based approach to deliver the CRISPR-Cas9 system. We designed sgRNAs “Oligo2” and  
248 “Oligo17” to target *App* mouse gene (Gene ID: 11820), and sgRNA “CRISPR-*Npas4*” to target  
249 *Npas4* mouse gene (Gene ID: 225872). sgRNAs were cloned in a lentiviral vector delivering  
250 sgRNA, SpCas9 and coexpressing eGFP (Addgene #57818) according to author instructions  
251 (Heckl et al., 2014). The negative control (Ct) used was the lentiviral construct without sgRNA but  
252 expressing SpCas9 and eGFP. sgRNA sequences, scores and PAMs are provided in Table 2 in  
253 Supplementary material. Briefly, sgRNAs purchased at Sigma-Aldrich (St Louis, MO, USA) were  
254 designed using on/off-target score algorithm and cloned into the pL.CRISPR.EFS.GFP plasmid.  
255 Vectors were validated by sequencing (Beckman Coulter Genomics, UK), produced and purified  
256 using Plasmid Midi kit (Qiagen, Hilden, Germany). Lentiviruses were produced by transfecting  
257 HEK293-T cells in 10 cm dishes ( $2 \times 10^6$  cells/dish) with lentiviral CRISPR-Cas9 vectors, pCMV-  
258 dR8.2 (Addgene#12263) and pMD2.G (Addgene#12259). After 48 h, the supernatant was filtered  
259 and incubated with 1/3 (v/v) of LentiX™ Concentrator for 90 min on ice. The collected supernatant  
260 was centrifuged at 1500xg for 45 min at 4°C, the pellet was resuspended in 20 µl per dish of  
261 Neurobasal® Medium and stored at -80°C until use. Empty backbone of pL-CRISPR.EFS.GFP  
262 was used as negative control (Ct) in our studies.

263 Neurons were infected with lentiviruses CRISPR-Cas9 1 day after plating (DIV1). Typically, 20  
264 µl of concentrated virus were used to infect 800.000 cells per well of 12 well plate dish. The  
265 medium was completely changed after 24 hours and a half media change was carried out every 2-  
266 3 days thereafter. The neurons were harvested at 7 days in vitro (DIV7) or as indicated.

### 267 ***Lentiviral toxicity assay***

268 Cell viability was measured by LDH release in the culture medium at DIV7 after lentiviral infection  
269 using Cytotoxicity Detection kit (Sigma-Aldrich, St-Louis, MO, USA) according to the  
270 manufacturer's instructions. Relative absorbance was measured at 490 nm using a VICTOR



271 Multilabel Plate Reader (PerkinElmer, Richmond, VA, USA). Background LDH release was  
272 determined in non-infected control cultures.

### 273 ***Flow cytometry and cell sorting***

274 After DIV7, infected neurons were briefly rinsed with PBS and trypsinized for 2 min. Neurons  
275 were mechanically dissociated and filtered through 70  $\mu\text{m}$  Falcon™ Cell Strainers in 50 ml tube  
276 containing FBS. Cells were pelleted by centrifugation at 1000xg for 5 min and resuspended in  
277 PBS/1% FBS/1mM EDTA. TO-PRO™-3 Iodide (Thermo Fisher Scientific) was used to stain dead  
278 cell and exclude them for the sorting. Cells were sorted using a BD FACSAria™III cell sorter (BD  
279 Biosciences, San Jose, CA) on the “Flow cytometry and cell sorting - CYTF” UCL platform. The  
280 sort parameters used were the following: nozzle 100  $\mu\text{m}$ , sheath pressure 20 psi, drop frequency  
281 30 kHz and sort precision 16-32-0. Sample and collection tubes were maintained at 4°C throughout  
282 the sort. GFP-negative and positive cells were harvested in PBS/1% FBS/1mM EDTA and  
283 centrifuged at 12000xg for 2 min and homogenized in TriPure Isolation Reagent for RNA  
284 extraction.

### 285 ***Glutamate and GABA measurements***

286 Glutamate and  $\gamma$ -aminobutyric acid (GABA) were measured in medium and in cells at DIV7.  
287 Briefly, neurons were grown at 200,000 cells/cm<sup>2</sup> in 12 well plate culture dish. Media were  
288 harvested, centrifuged to pellet cell's debris and supplemented with cocktail of proteases inhibitors  
289 and frozen at -20°C until use. Cells were scratched in ice cold PBS and pelleted by centrifugation  
290 (12,000xg for 3 min at 4°C) then quickly frozen in liquid nitrogen and kept at -80°C until use. *For*  
291 *glutamate assay*: Media were directly used as are. Cells were prepared according to the  
292 manufacturer protocol and measurement was normalized on protein content. *For GABA ELISA*  
293 *assay*: Media were directly used as are. Cells were lysed by 5 cycles of thawing and freezing in  
294 PBS and centrifuged at 12,000xg for 10 min at 4°C. Supernatant was used for the quantification  
295 and normalized on protein content.

### 296 ***Statistical analysis***

297 *Microarray analysis*: Raw data were analyzed using Bioconductor (R environment). Robust  
298 Multiarray Average (RMA) was used for background correction, normalization, probe level  
299 intensity calculation and probe set summarization. Gene expression values were compared between  
300 APP<sup>+/+</sup> and APP<sup>-/-</sup> neurons at different stage of development DIV3, DIV7 and E18 using the R-  
301 Limma (Linear Models for MicroArray Data) package. Benjamini-Hochberg procedure was used  
302 for multiple testing corrections. From raw data, only transcripts with an Entrez ID were kept in  
303 order to facilitate the analysis. Gene set enrichment analysis was performed on differentially  
304 expressed genes sets after the ROAST (Rotation gene set tests for complex microarray  
305 experiments) (Wu et al., 2010) procedure to identify KEGG pathways modified in absence of APP  
306 for all conditions (E18, DIV3 and DIV7). The data obtained have been deposited in NCBI's Gene  
307 Expression Omnibus (Edgar et al., 2002) and are accessible through GEO Series accession number  
308 GSE112847 (<https://www.ncbi.nlm.nih.gov/geo/query/acc.cgi?acc=GSE112847>).

309 Otherwise, statistical analyses were performed using GraphPad Prism (GraphPad Software, San  
310 Diego, CA). Gaussian distribution was assessed by Kolmogorov-Smirnov test (GraphPad Prism).  
311 If the data follow normal distribution parametric test was applied. Otherwise non parametric test  
312 was used. If two groups were compared, parametric Student's t-test or non-parametric Mann-  
313 Whitney test were used. If more than two groups were compared, parametric ANOVA with post  
314 hoc tests as indicated or non-parametric Kruskal-Wallis were used. (\*,  $p < 0,05$ ; \*\*,  $p < 0,01$ ; \*\*\*,  
315  $p < 0,001$ ). The number of biological replicate (n) analyzed is indicated in figure legends in the  
316 number of independent experiment (N).

317

## 318 **Results**

### 319 **APP-dependent expression of *Npas4* in differentiated primary neuron cultures**

320 Experiments were performed on primary neuron cultures according to the workflow described in  
321 Supplementary Figure S1A. Briefly, neurons from embryonic cortex (E18) were cultured for 3 or  
322 7 days in vitro (DIV3 or DIV7) and longer (up to DIV14) when necessary. We first characterized  
323 the expression of APP family proteins and observed an increase in APP, APLP1 and APLP2 upon  
324 differentiation with a peak of expression at DIV 7-8 (Figure S1B-C), supporting an important role  
325 of APP protein family in neuronal maturation. No modifications of APLP1 or APLP2 levels and  
326 maturation were observed in APP<sup>-/-</sup> neurons when compared to APP<sup>+/+</sup> at any time point of  
327 differentiation studied (Figure S1D). Thus, results obtained here in APP<sup>-/-</sup> neurons can be related  
328 to the loss of APP and not to indirect effects resulting from up- or down-regulation of APLP1 or  
329 APLP2. Previous studies indicated that AICD is detectable inside the nucleus specifically at DIV6-  
330 7 (Kimberly et al., 2005) suggesting that AICD-dependent gene transcription is temporally  
331 restricted. We checked for AICD production at DIV7 in total lysates of APP<sup>+/+</sup>, APP<sup>+/-</sup> and APP<sup>-/-</sup>  
332 cultures (Figure S1E). AICD was readily detectable in APP<sup>+/+</sup> neurons at but only at high  
333 exposure time, confirming that it is a transient peptide (Huyseune et al., 2007) with a restricted  
334 temporally expression pattern in primary neurons. AICD-dependent transcriptional regulation may  
335 therefore only occur within a defined time-period, around DIV7 (and not at DIV3).

336 To investigate this, we performed microarray experiments, which allow description of genome-  
337 wide expression changes in APP<sup>+/+</sup> and APP<sup>-/-</sup> primary cortical neurons at DIV3 (immature  
338 neuronal network), DIV7 (neuronal network with detectable AICD) and in E18 cortical tissue  
339 (summarized in Figure S1A). We used *Affymetrix GeneChip® Mouse Transcriptome 1.0 Array* and  
340 carried out data analysis with the R-Limma (**L**inear **M**odels for **M**icro**A**rray **D**ata) package (Ritchie  
341 et al., 2015). The chips used allow the profiling of coding and non-coding (lncRNA, miRNA,  
342 pseudogene...) gene expression as well as alternative splicing events. We ran each condition (E18,  
343 DIV3, and DIV7) in triplicate (3 chips used for each condition, from independent cultures). We  
344 focused here on differentially expressed coding genes, although data were collected for non-coding  
345 RNAs (not shown). Strikingly, the overall changes observed (fold changes) were moderate in all  
346 conditions (E18, DIV3 and DIV7). Few coding transcripts appear to be differentially expressed  
347 when the specific fold change (linear) is set at 1.25, 1.5 or 2 (Figure 1A). The Benjamini-Hochberg  
348 multiple correction test did not reveal any robust differential gene expression (adjusted p-value  
349 <0,05) except as expected for *APP* (positive control). Gene enrichment analysis was performed  
350 using ROAST (Rotation gene set test for complex microarray experiment) procedure to finally  
351 identify molecular interaction/reaction networks diagram (Kanehisa and Goto, 2000) also known  
352 as KEGG pathway altered in the absence of APP. The first five pathways (in terms of significance),  
353 the number of genes modified as well as their direction are shown in Figure 1B. Interestingly, *ECM*  
354 (*extracellular matrix*)-*receptor interaction* and *Long-term potentiation* pathways are modulated in  
355 absence of APP at DIV7. Cell-ECM interactions are mediated by transmembrane receptors and cell  
356 adhesion proteins, involved in adhesion, differentiation and maturation. Long term potentiation

357 (LTP) is a major mechanism in memory formation and learning. Both of these pathways have been  
358 associated to APP function (Caceres and Brandan, 1997; Seabrook et al., 1999; Puzzo et al., 2011).  
359 To note, we did not measure any expression change (Supplementary Table 3) of genes identified  
360 as AICD target genes (Pardossi-Piquard and Checler, 2012).

361 We decided to further select genes relevant to described APP cellular function in order to further  
362 investigate their regulation by APP. In a set of array (APP<sup>+/+</sup>, accession number GSM3089741 vs  
363 APP<sup>-/-</sup> accession number GSM3089744) from a primary neurons at DIV7, we noticed a down-  
364 regulation of (IEGs) in APP<sup>-/-</sup> neurons (Figure 1C). Among them, the activity-dependent  
365 transcription factor, *Npas4* (Neuronal PAS domain protein 4) was of particular interest. NPAS4 is  
366 a neuron-specific IEG, known to be regulated by neuronal activity and involved in synaptic  
367 plasticity and synaptic homeostasis. We confirmed by qPCR that the *Npas4* mRNA level was  
368 decreased at DIV7 in APP<sup>-/-</sup> neurons compare to APP<sup>+/+</sup>, but not at DIV3 nor in the cortex at E18  
369 (Figure 1D). To note, the expression of other early genes (*Egr1* and *Egr3*) previously reported to  
370 be involved in APP-dependent gene expression (Hendrickx et al., 2013) were not altered in our  
371 conditions (Figure S2A, S2B).

#### 372 ***Npas4* expression is AICD-independent**

373 Since transcription of APP target genes could involve AICD (Belyaev et al., 2010), which is  
374 produced particularly at DIV7, we inhibited its release by treating neurons with 1 $\mu$ M DAPT for 16  
375 h, a well-described non-competitive  $\gamma$ -secretase inhibitor (Dovey et al., 2001). DAPT treatment  
376 induced APP CTFs accumulation (Figure 2A), indicating that  $\gamma$ -processing thus AICD release were  
377 inhibited under these conditions (Hage et al., 2014). DAPT treatment didn't decrease *Npas4*  
378 expression in APP<sup>-/-</sup> primary neurons, but indeed increased it in APP<sup>+/+</sup>. To further address the  
379 role of AICD in *Npas4* regulation, we transduced primary neurons with a lentiviral vector  
380 expressing the 50 C-terminal amino acids of APP (AICD) fused (C-terminus) to the hemagglutinin  
381 tag (HA). AICD-HA is detectable in infected cells (Figure 2C), and AICD expression in APP<sup>-/-</sup>  
382 neurons did not modify *Npas4* mRNA levels (Figure 2D), confirming that AICD is not involved in  
383 APP-dependent *Npas4* transcriptional regulation. As some of the APP functions were found to rely  
384 on its extracellular soluble fragment (sAPP $\alpha$ ), we tested whether the sAPP $\alpha$  can regulate *Npas4*  
385 expression *per se*. Neuronal cultures were treated with 20 nM of human sAPP $\alpha$  for 16 h (Figure  
386 2E) and *Npas4* expression was measured by qPCR. *Npas4* mRNA levels increased significantly  
387 upon sAPP $\alpha$  addition in APP<sup>+/+</sup> neurons, but not in APP<sup>-/-</sup> (Figure 2F). These data provide a  
388 general insight into APP-dependent *Npas4* transcription in neurons. (i) AICD release is not  
389 involved in this process; (ii) APP soluble ectodomain (sAPP $\alpha$ ) regulates *Npas4* expression, only in  
390 a context where endogenous APP is expressed. Important to note, glial cells represent about ~16%  
391 of total cells in primary cultures, and can indirectly contribute to the mechanisms we observed.  
392 However, absence of APP did not change the astrocytic pattern of primary cultures, and astrocytes  
393 do not express readily detectable *Npas4* levels (Figure S3A-B). Hence, our observations reflect  
394 APP-dependent *Npas4* regulation truly acting in neurons

395 The APP-dependent transcriptional regulations we observed were subtle when compared to those  
396 reported in the literature, in line with the mild phenotype of APP knockout mice (Muller et al.,  
397 1994; Zheng et al., 1995). Although we did not observe compensation of APP loss by APLP  
398 overexpression in our model, APP-dependent gene regulations that appear in the close-up could be  
399 hidden in the long term or related to functional redundancies with other members of the APP family  
400 (Shariati and De Strooper, 2013). In this line, APP<sup>-/-</sup> mice brain phenotype is better unraveled by  
401 acute down-regulation of APP (Senechal et al., 2007). We decided therefore to knock-down the  
402 APP expression in APP<sup>+/+</sup> neurons with a lentiviral-based CRISPR-Cas9 genome editing approach  
403 (Jinek et al., 2012), to test the consequence of acute APP knock-down on *Npas4* expression. Nearly  
404 ~50% of the cells in culture were infected under our conditions (Figure S4A-B) and no lentiviral  
405 toxicity was measured (Figure S4C). Only neuronal cells were infected, reflecting the tropism of  
406 the viral particles for neurons, and not for glial cells. APP expression was monitored by ICF (Figure  
407 3A) and by measuring the intensity of APP signal in GFP-positive (infected) neurons (Figure 3B).  
408 APP was strongly decreased in neurons infected with viruses expressing the Oligo2 and 17 sgRNA  
409 sequences targeting APP exon1 and exon 2, respectively, when compared to Ct. This was  
410 confirmed by Western blotting showing the APP expression specifically decreased by about 50%.  
411 Importantly, APLP1 and 2 expressions were not altered in cultures infected with Oligo2 and  
412 Oligo17 lentiviruses (Figure 3 C), clearly indicating that off targets mechanisms - a major risk with  
413 CRISPR-Cas9 approaches, especially with homologous genes - are not observed in our  
414 experimental setup.

415 We decided to measure the expression of *Npas4* after APP knock-down selectively in GFP-positive  
416 (knock-down) neurons. This was achieved by sorting GFP positive cells by flow cytometry. We  
417 used TO-PRO<sup>TM</sup>-3 staining as a viability marker to exclude dead cells from the analysis and set  
418 sorting parameters by using non-infected condition (no GFP) and neurons expressing GFP (GFP  
419 infected) as standards. *Npas4* mRNA levels were measured in these cells by qPCR (Figure 3D).  
420 *Npas4* mRNA was readily decreased in neurons infected with Oligo2- and 17-expressing  
421 lentiviruses. Acute APP knock-down achieved with the CRISPR-Cas9 system in primary neurons  
422 resulted in the decrease in *Npas4* expression, confirming the APP-dependent *Npas4* transcriptional  
423 expression observed in APP deficient neurons.

#### 424 **APP deficiency increases the markers of GABAergic transmission**

425 Down-regulation of *Npas4* expression in the absence of APP could reflect an impairment in neurite  
426 formation and/or synaptogenesis which may lead to deficient in basal neuronal activity. APP was  
427 reported to modulate neurite outgrowth and synapse formation (Priller et al., 2006; Young-Pearse  
428 et al., 2007; Tyan et al., 2012; Billnitzer et al., 2013) but the mechanisms by which APP modulates  
429 synapse formation and plasticity is poorly understood. We first analyzed neuronal arborization at  
430 DIV7, when *Npas4* expression is decreased. We monitored arborization by measuring the area of  
431 the neuron-specific microtubule associated protein2 (MAP2) signal per cell from DIV1 to DIV7  
432 (Figure 4A). APP<sup>-/-</sup> neurons extend neurites and no difference was observed at DIV1 to DIV3. The



433 absence of APP subtly (but significantly) increased MAP2 signal at DIV7 (Figure 4B), indicating  
434 the importance of APP for proper neurite arborization.

435 *Npas4* is involved in the fine tuning of excitatory/inhibitory homeostasis, by controlling the balance  
436 of excitatory and inhibitory inputs on post-synaptic neurons (Lin et al., 2008; Bloodgood et al.,  
437 2013; Spiegel et al., 2014). This characterized by the type of neurotransmitter released: typically  
438 glutamate for excitatory synapses and GABA for inhibitory synapses. We measured the amount of  
439 GABA and glutamate released in medium and present in the cells at DIV7 (Figure 5A-B). The  
440 concentration of GABA is increased by 83% in the medium of APP<sup>-/-</sup> neurons (Figure 5A), and  
441 no difference was observed for GABA measured in cells. Strikingly, we observed no significant  
442 change in glutamate concentration (cell or medium) in APP<sup>-/-</sup> neuronal cultures compare to  
443 APP<sup>+/+</sup> (Figure 5B). This is supported by the only slight qualitative modifications in glutamate  
444 responses measured by intracellular calcium imaging in APP<sup>-/-</sup> neurons (Figure S5). GABA is  
445 synthesized by the glutamate decarboxylase enzymes (GAD<sub>65</sub> and GAD<sub>67</sub>) that catalyze the  
446 decarboxylation of glutamate to GABA. GAD<sub>65</sub> synthesizes GABA for neurotransmission, and is  
447 therefore active at nerve terminals and synapses. By immunostaining, we observed that GAD<sub>65</sub>  
448 signal is increased in APP<sup>-/-</sup> neurons compared to APP<sup>+/+</sup> neurons (Figure 5C). This is not caused  
449 by an increase in the relative number of GABAergic neurons in APP<sup>-/-</sup> cultures compare to APP<sup>+/+</sup>  
450 (Figure S6), pointing to an increase in GAD65 cellular expression. To further address the effect of  
451 APP deficiency on GABAergic neurotransmission, we quantified the expression of the most  
452 prevalent GABA receptor subunit, GABARa1 expressed during neuronal development. We found  
453 GABARa1 to be slightly but significantly decreased in APP<sup>-/-</sup> neurons (Figure 5D), suggesting  
454 complex modifications of GABAergic neurotransmission. In summary, our results indicate that  
455 APP deficiency disturbs mainly GABAergic neurotransmission components with a little effect on  
456 the excitatory counterpart.

457 Finally, we evaluated whether impairments affecting GABAergic neurotransmission components  
458 we observed *in vitro* could be relevant in the brain. We quantified the expression of  
459 GAD65 in cortices and hippocampi of 3 month old mice deficient for APP (APP<sup>-/-</sup>) compared to  
460 their wild-type counterpart (APP<sup>+/+</sup>). Consistent increase in GAD65 expression is observed both  
461 in cortex (Figure 6A) and in hippocampus (Figure 6B) of APP<sup>-/-</sup> mice; indicating that GABAergic  
462 neurotransmission component GAD65 is also affected in adult mouse brain and supporting our *in*  
463 *vitro* findings.

#### 464 **Phenotype of NPAS4-deficient neurons mimics APP deficiency**

465 As for APP, we used the CRISPR-Cas9 approach in order to silence *Npas4* and analyze whether  
466 NPAS4 deficiency could recapitulate a major trait observed in APP<sup>-/-</sup> neurons, i.e. imbalance of  
467 inhibitory transmission by the upregulation of GABA release. Given that (i) CRISPR-Cas9 editing  
468 is hard to evaluate by quantifying mRNAs expression, (ii) that available antibodies poorly detect  
469 NPAS4 in basal conditions, we decided to check the down-regulation of *Npas4* gene expression by  
470 measuring NPAS4 protein upon depolarization by KCl (Lin et al., 2008). CRISPR-Cas9-induced



471 silencing resulted in a decrease in NPAS4 by approximately 50% (Figure 7A), a similar extent to  
472 that observed of mRNAs in APP<sup>-/-</sup> neurons at DIV7 (Figure 1D). This downregulation of NPAS4  
473 is not due to a lentiviral toxic effect (Figure S4C). Strikingly, like for APP-deficient neurons  
474 (Figure 5C), NPAS4-deficient neurons showed an increase in GAD65 staining (Figure 7B-C),  
475 GAD65 protein expression (Figure 7D), and GABA release in the medium (Figure 67C) when  
476 compared to control neurons. We measured the expression of GABA receptor subunit alpha 1  
477 (GABARa1) at DIV7 and observed, like in APP<sup>-/-</sup> primary neurons, a decrease in protein  
478 expression after *Npas4* knockdown (Figure 7D).

479

## 480 **Discussion**

481 One major APP function is to control synaptic formation, transmission and plasticity (Muller et al.,  
482 2017). We showed here that APP deficiency in cortical neurons impairs the balance between  
483 excitatory and inhibitory synaptic markers, and that this process relies on the activity-dependent  
484 transcription factor NPAS4. We initially identified the *Npas4* IEG as a potential APP target gene  
485 by a non-biased transcriptome profiling approach. The APP-dependent regulation of *Npas4*  
486 expression involves its extracellular domain (sAPP $\alpha$ ) but not AICD. APP appears to exert a fine  
487 tuning of excitatory/inhibitory synaptic inputs in neurons and its absence enhances, through the  
488 downregulation of *Npas4*, inhibitory GABAergic transmission.

## 489 **APP-dependent expression of *Npas4* in differentiated neuronal culture**

490 The transcriptome analysis of APP<sup>+/+</sup> vs. APP<sup>-/-</sup> neurons at embryonic day 17 (E18-DIV0) and at  
491 different stages of primary cortical neuron differentiation (DIV3-DIV7) indicated that the  
492 transcriptional changes in the absence of APP were moderate. This unexpected result is however  
493 in line with a comparative transcriptome study of APP family members in the adult mouse cortex  
494 (Aydin et al., 2011). One possible explanation to the subtle effects of APP deficiency on the  
495 transcriptome can be functional compensation by APLPs (Shariati and De Strooper, 2013).  
496 However, we did not measure any changes in APLP1 and APLP2 expression in our APP<sup>-/-</sup> models  
497 in agreement with previous observations total brain extracts (Zheng et al., 1995) or in primary  
498 cortical neurons (White et al., 1998). Transcriptional modifications we measured are thus related  
499 to APP *per se*. APP-dependent transcriptional regulations are subtle, and likely to act by fine-tuning  
500 classes of gene involved in neuronal pathway rather than single target genes. In addition, we found  
501 that none of the APP/AICD target genes were differentially expressed in APP<sup>-/-</sup> neurons at DIV3-  
502 DIV7 or at E18 (See Supplementary Table 3). The identification of AICD-dependent gene  
503 expression stemmed from studies carried out in an array of *in vitro*- and -to a lesser extent- *in vivo*  
504 models (for review see Pardossi-Piquard and Checler, 2012; Grimm et al., 2013). Some of these  
505 findings were confirmed or debated in subsequent investigations (Hebert et al., 2006; Chen and  
506 Selkoe, 2007; Waldron et al., 2008; Aydin et al., 2011). AICD-dependent gene transcription and  
507 how it relates to APP function appears thus, if not controversial, scarcely understood.

508 We found that the expression of *Npas4*, an activity-dependent IEG, is downregulated in the absence  
509 of APP and particularly at DIV7. *Npas4* downregulation was observed in APP<sup>-/-</sup> primary neurons  
510 and upon acute APP knock-down by a CRISPR-Cas9 approach (Figure 3D), establishing a causal  
511 relation between APP and *Npas4* transcription. Furthermore, APP-dependent *Npas4* expression at  
512 DIV7 does not rely on AICD release, although DIV7 corresponds to the differentiation stage where  
513 AICD is readily produced by neurons (Kimberly et al., 2005). Previous studies indicated that  
514 regulation of some APP target genes does not require the generation of AICD (Hicks et al., 2013).  
515 Quite strikingly, DAPT treatments, used to block AICD production in our setup, increased *Npas4*  
516 expression in APP<sup>+/+</sup> neurons. This effect might imply that inhibition of  $\gamma$ -secretase increases the  
517 neuronal activity in an APP-dependent manner (APP<sup>-/-</sup> neurons showed no modification of *Npas4*

518 expression after treatment). In line with this,  $\gamma$ -secretase inhibition was shown to increase  
519 excitatory postsynaptic currents (EPSCs) (Priller et al., 2006; Restituto et al., 2011). Further  
520 investigations are required to understand this observation. However, one hypothesis could be that  
521 the loss of A $\beta$  underlies the DAPT effects we observed. Several studies reported that A $\beta$  depresses  
522 AMPA- and NMDA-receptor mediated currents and EPSCs in neurons arguing toward a negative  
523 feedback of A $\beta$  on synaptic transmission (Kamenetz et al., 2003; Snyder et al., 2005; Hsieh et al.,  
524 2006). This feedback is not possible in a APP<sup>-/-</sup> background. Alternatively, studies indicated that  
525 inhibition of  $\gamma$ -secretase induces an increase of production of sAPP $\alpha$  (Chen et al., 2015). In that  
526 case, increased activity related to increased sAPP $\alpha$  production would corroborate the results we  
527 obtained on *Npas4* expression by treating neurons with sAPP $\alpha$ . We also found that sAPP $\alpha$  effects  
528 on *Npas4* expression are observed only in APP<sup>+/+</sup> and not in APP<sup>-/-</sup> background. This observation  
529 indicates that (i) the transcriptional effects of sAPP $\alpha$  require the presence of endogenous APP  
530 holoproteins (ii) homophilic ectodomain interactions are likely to be involved. Soluble APP has  
531 been shown to rescue many traits of APP-deficient mice (Ring et al., 2007; Weyer et al., 2014) and  
532 was suggested to promote its physiological effects by interaction with APP holoprotein (Milosch  
533 et al., 2014; Deyts et al., 2016).

#### 534 **Alteration of GABAergic inputs in APP deficient neurons are related to *Npas4*** 535 **downregulation**

536 In the absence of APP, we observed an increase in neuronal outgrowth and GAD65 signal, as well  
537 as increased GABA release in the medium. To note, *Npas4* knockdown mimics APP deficiency on  
538 GAD65 levels and GABA measurements (Figure 8). This supports the hypothesis APP regulates  
539 the fine-tuning inhibitory synaptic transmission in the neuronal network through NPAS4. First, this  
540 is in agreement with very recent work showing that APP regulates GABAergic neurotransmission  
541 during neuronal differentiation (Doshina et al., 2017). *In vivo* studies evidenced increased GABA  
542 levels in the brain of APP<sup>-/-</sup> mice (Lee et al., 2010). Secondly, the finding that APP-dependent  
543 neuronal processes are mediated by NPAS4 is relevant to experimental evidences reported in  
544 previous studies. NPAS4 possesses unique features among the IEGs (Sun and Lin, 2016): (i) it is  
545 only expressed in neurons; (ii) it is activated selectively by neuronal activity; (iii) it has been shown  
546 to be important to shape glutamatergic and GABAergic synaptic inputs. NPAS4 is implicated in a  
547 transcriptional program that regulates neuronal firing responses to excitatory transmission by  
548 enhancing inhibition (Lin et al., 2008), and is critical for the homeostatic mechanisms that keep  
549 neuronal firing in response to stimuli within normal levels (Spiegel et al., 2014). Increasing the  
550 excitability of a set of neurons leads to changes in both their input and axonal synapses. NPAS4 is  
551 necessary for modulating the inputs synapses but not the axonal synapses of these neurons (Sim et  
552 al., 2013). NPAS4 is induced in excitatory neurons, where it promotes increased numbers of  
553 inhibitory synaptic inputs. (Spiegel et al., 2014). Altogether, these specific functions of NPAS4  
554 correlate well with our main observation that APP-dependent *Npas4* expression is related to the  
555 upregulation of the GABAergic system in APP-deficient neurons. This is not restricted to primary  
556 neurons, since we measured an increase in markers of GABAergic synapses in adult mouse brain.

557 The overall effect of APP deficiency of neuronal network activity and synaptic transmission needs  
558 further neurophysiological investigations that are beyond the scope of the present study. Important  
559 points must be kept in mind here. First, GABAergic transmission shifts from excitatory to  
560 inhibitory during development (Ben-Ari, 2002), and our findings should be evaluated by  
561 electrophysiological recordings in mature neurons. For instance, we found that the level of GABA  
562 receptor subunit alpha 1 (GABA $\alpha$ 1) was diminished in the absence of APP and in NPAS4-  
563 deficient neurons. This is in agreement with recent study showing that GABA $\alpha$ 1 is particularly  
564 decrease in hippocampus of APP $^{-/-}$  mice (Chen et al. 2017) correlating with a decrease in IPSC  
565 amplitude. But on the other hand, it suggests that increases in GABA release in APP-deficient  
566 models may not result in a net increase of inhibitory transmission, or at least there is a complex  
567 modulation of neuronal response to GABA.

### 568 **Possible relevance to the AD pathophysiology**

569 APP plays a central role in the onset and progression of AD by releasing the A $\beta$  peptide, but, APP  
570 deficiency is more difficult to correlate to the pathology. Still, it is admitted that impairment of  
571 APP function *per se*, either caused by FAD mutations or upon ageing, may contribute to neuronal  
572 dysfunction occurring in the disease. For instance, the phenotype of APP deletion in the CNS is  
573 age-dependent (Priller et al., 2006). Upon aging, impairments in learning and memory associated  
574 with deficits in LTP are observed in APP-deficient mice (Ring et al., 2007). The role of APP in  
575 maintaining spine architecture is supported by the reduction in dendritic length and branching as  
576 well as in total spine density in old APP-deficient mice (Lee et al., 2010; Tyan et al., 2012). A  
577 severe decrease in metabolic activity was also observed in presynaptic densities of APP KO  
578 animals (Lassek et al., 2017). This is an important feature, because bioenergetics and metabolic  
579 activity are fueling the synthesis of neuromediators (glutamate and consequently GABA), and  
580 providing energy supply and calcium buffering essential for synaptic function and plasticity.

581 Significantly lower levels of GABA and glutamate were measured in the temporal cortex of AD  
582 patients, pointing to deficient synaptic function and an imbalance in neuronal excitatory/inhibitory  
583 transmission (Gueli and Taibi, 2013). These observations unambiguously support changes in  
584 neurotransmission in AD (and even in ageing brain), but the mechanisms underlying this process  
585 are hardly understood. Here we found that neuronal activity by itself, sensed by the NPAS4 IEG,  
586 reshapes synaptic GABAergic inputs on neurons, in line with recently reported modifications of  
587 GABA transmission in AD models (Doshina et al., 2017). Very interestingly, NPAS4 expression  
588 decreases along with AD progression, particularly at Braak NFT stages (I-II) corresponding to  
589 lesions developed in transentorhinal/entorhinal cortex (Miyashita et al., 2014). Downregulation of  
590 GABAergic transmission could also underlie the increased risk for unprovoked seizures observed  
591 in individuals with AD compared to non-demented individuals of the same age (Friedman et al.,  
592 2012).

593 In conclusion, our main observation that APP deficiency in neurons is integrated by the activity-  
594 dependent NPAS4 IEG to further re-modulate inhibitory and excitatory neuronal inputs, provides

595 new insight to understand the role of APP in synaptic activity, but also a mechanistic frame to  
596 further explore the impairments of network activity in AD.

597

## 598 **Figure Legends**

### 599 **Figure 1: APP-dependent expression of *Npas4* in young differentiating neuronal culture**

600 Summary of transcriptome analysis performed with the *GeneChip® Mouse Transcriptome Array*  
601 *1.0* (Affymetrix). Data were processed in triplicate (3 independent cultures) for each experimental  
602 time point (E18; DIV3; DIV7). Non-coding transcripts and alternative splicing products are  
603 detected by these arrays, but only transcripts of coding transcripts have been considered here. **A)**  
604 Number of up-and down-regulated coding transcript in APP<sup>-/-</sup> vs. APP<sup>+/+</sup> primary neurons at E18,  
605 DIV3 and DIV7. Linear fold changes have been set at 1,25, 1,5 and 2. **B)** KEGG pathway analysis  
606 (<http://www.genome.jp/kegg/pathway.html>) at E18, DIV3, DIV7 (APP<sup>-/-</sup> vs. APP<sup>+/+</sup>) to identify  
607 networks molecular pathways (or interaction networks) in which differentially expressed genes are  
608 clustered. The five most modified pathways are displayed for each time point, with the number of  
609 genes potentially up-or down-regulated. **C)** Immediate Early Genes (IEGs) expression in APP<sup>-/-</sup>  
610 vs. APP<sup>+/+</sup> primary neurons at DIV7 and their respective fold change (APP<sup>-/-</sup> vs APP<sup>+/+</sup>) in  
611 microarray analysis at DIV7. **D)** Neuronal PAS 4 domain (*Npas4*) mRNA level was measured by  
612 qPCR at E18, DIV3 and DIV7 (n=6, N=3). Results (mean ± SEM) are expressed as percentage of  
613 controls (APP<sup>+/+</sup>). n.s.= non-significant, \*p=0.0242, Student's t-test.

### 614 **Figure 2: APP metabolites but not AICD regulate *Npas4* expression**

615 **A)** Western blotting analysis of APP and C-terminal fragments (CTFs and AICD) in cortical  
616 neurons after 1 μM DAPT treatment for 16 h at DIV7. **B)** Quantification by qPCR of *Npas4* mRNA  
617 in APP<sup>+/+</sup> or in APP<sup>-/-</sup> neurons at DIV7 treated with 1 μM DAPT for 16 h (n=7, N=4). Results  
618 are expressed as percentage of control (Ct) (mean ± s.e.m.). \*p=0.0216, n.s.= non-significant,  
619 Student-t test. **C)** Western blotting analysis of AICD-HA expression after 3 days of lentiviral  
620 infection in cells with control or AICD-HA expressing vectors. Total cell lysate was analyzed with  
621 anti-HA antibody. **D)** Quantification by qPCR of *Npas4* mRNA in neurons at DIV7 infected with  
622 lentiviral vector expressing AICD-HA (n=6, N=2). Results are expressed as percentage of control  
623 (Ct) (mean± s.e.m). n.s.= non-significant, Student-t test. **E)** Medium of sAPP $\alpha$  treated APP<sup>+/+</sup> or  
624 APP<sup>-/-</sup> neurons was subjected to western blotting analysis using anti-human APP antibody (clone  
625 WO2) to detect the exogenous human sAPP $\alpha$  (h sAPP $\alpha$ ) and using anti-mouse APP antibody (clone  
626 22C11) to detect both endogenous and exogenous sAPP $\alpha$  (h+m sAPP $\alpha$ ). Medium was collected  
627 after 16 h of treatment. **F)** Quantification by qPCR of *Npas4* mRNA level in APP<sup>+/+</sup> (n=8, N=4)  
628 or in APP<sup>-/-</sup> neurons at DIV7 treated with 20 nM sAPP $\alpha$  for 16 h (n=6, N=3). Results are expressed  
629 as percentage of control (Ct) (mean ± s.e.m.). \*\*p=0.0055, n.s.= non-significant, Student-t test.

### 630 **Figure 3: Decreased *Npas4* expression in APP-silenced primary neurons**

631 APP was knock-down by CRISPR-Cas9 approach in primary neurons cultures. **A)** Cortical neurons  
632 were infected at DIV1 with lentiviruses expressing sgRNAs (Oligo2, Oligo17) or no sgRNA (Ct),  
633 SpCas9 and GFP. Cultures were immunostained for MAP2 (red), APP (blue) and DAPI (light blue)  
634 at DIV7. Arrowheads indicate the position of GFP-positive (infected) neurons in each condition.



635 Scale bar: 100 $\mu$ m. **B**) Quantification of APP signal in GFP-positive neurons. At least 33 neurons  
636 were quantified in two independent experiments for each condition (n=33 N=2). Results (mean  $\pm$   
637 SEM) are given as percentage of control (Ct). ###p<0,001 (Ct vs Oligo 2) \*\*\*p<0,001 (Ct vs  
638 Oligo17); Kruskal-Wallis test and Dunn's multiple comparison test. **C**) Left panel. Representative  
639 Western blots showing APP, APLP1, APLP2 and GAPDH protein level in cortical neurons at DIV7  
640 infected in the same conditions. NI = non-infected. Right panel, quantification of APP expression  
641 measured by Western blotting. Results (mean  $\pm$  SEM) are given as percentage of control (Ct).  
642 \*\*\*p<0,001 (Ct vs Oligo17), ###p<0,001 (Ct vs Oligo 2), ANOVA and Bonferroni's multiple  
643 comparison test (n=6, N=3). **D**) Sorting of GFP-expressing neurons (FACS). Scatter plots (FSC vs.  
644 SSC, left panels) of non-infected and GFP-expressing cells are shown. Dot plots (TOPRO-3, far  
645 red vs. GFP, right panels) were used to gate (green rectangle) GFP-positive/TOPRO-3 negative  
646 cells. RNA was extracted from these cells and Npas4 mRNA level was quantified by qPCR. Results  
647 were obtained from pooled samples (4 wells of 4 cm<sup>2</sup> each) for each condition (Ct, Oligo2 and  
648 Oligo17). Quantification were carried out on 2 independent experiments (N=2). Results (mean  $\pm$   
649 SEM) are expressed as percentage of Ct.

#### 650 **Figure 4: Altered neurites arborization of APP deficient neurons during in vitro maturation**

651 **A**) Cortical APP<sup>+/+</sup> or APP<sup>-/-</sup> were stained against the neuron-specific marker MAP2 and the  
652 nuclear dye DAPI at different stages of maturation (DIV1-2-3 and DIV7). Scale bar: 400 $\mu$ m. **B**)  
653 Quantification of MAP2 signal area normalized to the number of neurons at DIV1, 2, 3 and 7.  
654 Quantifications were from 3 fields of at least 6 coverslips from APP<sup>+/+</sup> and APP<sup>-/-</sup> neurons, in  
655 three independent experiments (N=3). Results (mean  $\pm$  SEM) are expressed as percentage of  
656 control (APP<sup>+/+</sup>). \*p=0,0293, Mann-Whitney test.

657

#### 658 **Figure 5: GABAergic markers are impaired in APP knock-out neurons**

659 **A**) Quantification of  $\gamma$ -amino butyric acid (GABA) in culture medium and cell extracts of APP<sup>+/+</sup>  
660 and APP<sup>-/-</sup> primary neurons at DIV7. Results (mean  $\pm$  SEM) are expressed as percentage of  
661 APP<sup>+/+</sup> (n=20, N=3). \*\*p=0,0024, n.s.= non-significant, Student-t test. **B**) Quantification of  
662 glutamate in culture medium and cell extracts of APP<sup>+/+</sup> and APP<sup>-/-</sup> neurons at DIV7. Results  
663 (mean  $\pm$  SEM) are expressed as percentage of APP<sup>+/+</sup> (n=16, N=3). n.s.= non-significant, Student-  
664 t test. **C**) Cortical APP<sup>+/+</sup> and APP<sup>-/-</sup> neurons at DIV7 were immunostained against the neuron-  
665 specific marker MAP2 and glutamate decarboxylase 65 (GAD65). Quantification of GAD65 signal  
666 area (5 fields per coverslip) was normalized to the number of cells. At least 2 coverslips were  
667 quantified for each group (APP<sup>+/+</sup> and APP<sup>-/-</sup>) in two independent experiments (N=2). Results  
668 (mean  $\pm$  SEM) are given as percentage of control (APP<sup>+/+</sup>). Scale bar: 200 $\mu$ m. \*p=0.0220, Mann-  
669 Whitney test. **D**) Neurons harvested at DIV7 and cell extracts analyzed by Western blotting for  
670 GABA $\alpha$ 1 and GAPDH expression. Quantification of GABA $\alpha$ 1 was normalized to GAPDH

671 expression. Results (mean  $\pm$  SEM) are expressed as percentage of Ct (n=5, N=2). \*p=0.0197,  
672 Student's t-test.

673 **Figure 6: GAD65 expression in cortex and hippocampus of adult mice**

674 **A)** *Left panel* Western blot analysis of GAD65 and GAPDH expression in cortex of 3 month old  
675 APP<sup>+/+</sup> and APP<sup>-/-</sup> mice (N=5). *Right panel* Quantification of GAD65 was normalized to GAPDH  
676 expression. Results (mean  $\pm$  SEM) are expressed as percentage of APP<sup>+/+</sup> (N=5). \*p=0.0166,  
677 Student's t-test. **B)** *Left panel* Western blot analysis of GAD65 and GAPDH expression in  
678 hippocampus of 3 month old APP<sup>+/+</sup> and APP<sup>-/-</sup> mice (N=5). *Right panel* Quantification of  
679 GAD65 was normalized to GAPDH expression. Results (mean  $\pm$  SEM) are expressed as percentage  
680 of APP<sup>+/+</sup> (N=5). \*p=0.0404, Student's t-test.

681

682 **Figure 7: Npas4 silencing by CRISPR-Cas9 mimicks cell phenotype observed in APP**  
683 **deficient neurons.**

684 Changes on inhibitory (GABA) synapses was analyzed after *Npas4* silencing **A)** *Left panel.*  
685 Cortical neurons infected with CRISPR-Cas9 lentivirus targeting *Npas4* gene (CRISPR-*Npas4*)  
686 show reduced NPAS4 levels as measured by Western blotting after membrane depolarization with  
687 50mM potassium chloride (KCl). Control viruses without sgRNA were used as controls (Ct). Note  
688 that NPAS4 is barely detectable in non-depolarized neurons (Ct). *Right panel.* Quantification of  
689 NPAS4 protein level after 2, 3 and 4h of KCl depolarization. Results (mean  $\pm$  SEM) are expressed  
690 as percentage of non-treated controls Ct (N=2). \*\*\*p<0,0001 Student's t-test. **B)** Cortical neurons  
691 infected with CRISPR-*Npas4* lentiviruses at DIV1 were immunostained against MAP2 and  
692 glutamate decarboxylase 65 (GAD65) at DIV7. Quantification of GAD65 signal was normalized  
693 to the number of cells (5 fields per coverslip, 2 coverslips for each genotype in two independent  
694 experiments, N=2). Results (mean  $\pm$  SEM) are given as percentage of control (Ct). Scale bar:  
695 200 $\mu$ m. \*\*p=0.0024. Mann-Whitney test. **C)** Quantification of  $\gamma$ -amino butyric acid (GABA) in  
696 culture medium at DIV7 of infected control neurons (Ct) and CRISPR-*Npas4* infected neurons.  
697 Results (mean  $\pm$  SEM) are expressed as percentage of Ct (n=5, N=2). \*p=0,0146, Student-t test.  
698 **D)** Neurons harvested at DIV7 and cell extracts analyzed by Western blotting for GABAR $\alpha$ 1,  
699 GAD65 and GAPDH expression. Quantification of GABAR $\alpha$ 1 and GAD65 were normalized to  
700 GAPDH expression. Results (mean  $\pm$  SEM) are expressed as percentage of Ct (n=8, N=3).  
701 \*p=0.049, #p=0.0247, Student's t-test.

702

703

704 **Abbreviations**

705 A $\beta$ , amyloid- $\beta$  peptide; AChE, acetylcholinesterase; AD, Alzheimer's disease; AICD, APP  
706 intracellular domain; APP, Amyloid Precursor Protein; APLP1, APP-like Protein1; APLP2, APP-  
707 like Protein 2; PPD, paired pulse depression; CRISPR, clustered regularly interspaced short  
708 palindromic repeats; DAPT, N-[N-(3,5-Difluorophenacetyl)-L-alanyl]-S-phenylglycine t-butyl  
709 ester; ECM, extracellular matrix; GABARa1, GABA(A) receptor subunit alpha-1 ; GAD65,  
710 glutamate decarboxylase 65; GRIK1, glutamate ionotropic receptor kainate type subunit-1; IEG,  
711 immediate early gene; KA, kainic acid; LTP, long term potentiation; NPAS4, neuronal PAS domain  
712 protein 4; sAPP $\alpha$ , soluble APP alpha.

713

714 **Acknowledgments**

715 pLenti CMV/TO Puro empty (w175-1) was a gift from Eric Campeau & Paul Kaufman (Addgene  
716 plasmid #17482). pL-CRISPR.EFS.GFP (Addgene plasmid # 57818) and pL-CRISPR.EFS.tRFP  
717 (Addgene plasmid # 57819) were a gift from Benjamin Ebert. pCMV delta R8.2 (Addgene plasmid  
718 # 12263) and pMD2.G (Addgene plasmid # 12259) were a gift from Didier Trono. We thank  
719 Jerome Ambrose for insight and technical support in the analysis of microarray data. We thank  
720 Nicolas Dauguet for the cell cytometry sorting of the neurons. We thank Devkee Mahesh Vadukul  
721 for her critical and linguistic revision of the manuscript.

722

723 **Author contributions**

724 R.O. and P.K.C. designed the research study; R.O. conducted the experiments, with the help of  
725 B.T., S.C., C.V., A.D., N.P. and F.P. Intracellular calcium measurement were designed and  
726 performed with the help of P.D. and M.V. All the authors analyzed data. R.O. and P.K.C. wrote  
727 the manuscript with the inputs of S.S., N.P. and J.N.O. All the authors have read and approved the  
728 final manuscript.

729 **Funding**

730 This work was supported by the Belgian Fonds pour la formation à la recherche dans l'industrie et  
731 l'agriculture (FRIA-FNRS), the Interuniversity Attraction Pole Programme-Belgian State-Belgian  
732 Science Policy (IAP-P7/16 and IAP-P7/13), The Belgian Fonds de la Recherche Scientifique  
733 Médicale (FRSM), the Queen Elisabeth Medical Foundation (FMRE), the Fondation pour la  
734 Recherche sur la Maladie d'Alzheimer (SAO/FRA) and by the Action de Recherche Concertée  
735 (ARC 14/19-059)

736 **Conflict of interest statement**

737 The authors confirm that there are no conflicts of interest.

738

739

## 740 **References**

- 741 Alberini, C.M. (2009). Transcription factors in long-term memory and synaptic plasticity. *Physiol Rev*  
742 89(1), 121-145. doi: 10.1152/physrev.00017.2008.
- 743 Aydin, D., Filippov, M.A., Tschape, J.A., Gretz, N., Prinz, M., Eils, R., et al. (2011). Comparative  
744 transcriptome profiling of amyloid precursor protein family members in the adult cortex. *BMC*  
745 *Genomics* 12, 160. doi: 10.1186/1471-2164-12-160.
- 746 Belyaev, N.D., Kellett, K.A., Beckett, C., Makova, N.Z., Revett, T.J., Nalivaeva, N.N., et al. (2010). The  
747 transcriptionally active amyloid precursor protein (APP) intracellular domain is preferentially  
748 produced from the 695 isoform of APP in a {beta}-secretase-dependent pathway. *J Biol Chem*  
749 285(53), 41443-41454. doi: 10.1074/jbc.M110.141390.
- 750 Ben-Ari, Y. (2002). Excitatory actions of gaba during development: the nature of the nurture. *Nat Rev*  
751 *Neurosci* 3(9), 728-739. doi: 10.1038/nrn920.
- 752 Billnitzer, A.J., Barskaya, I., Yin, C., and Perez, R.G. (2013). APP independent and dependent effects on  
753 neurite outgrowth are modulated by the receptor associated protein (RAP). *J Neurochem* 124(1),  
754 123-132. doi: 10.1111/jnc.12051.
- 755 Bloodgood, B.L., Sharma, N., Browne, H.A., Trepman, A.Z., and Greenberg, M.E. (2013). The activity-  
756 dependent transcription factor NPAS4 regulates domain-specific inhibition. *Nature* 503(7474), 121-  
757 125. doi: 10.1038/nature12743.
- 758 Born, H.A., Kim, J.Y., Savjani, R.R., Das, P., Dabaghian, Y.A., Guo, Q., et al. (2014). Genetic suppression  
759 of transgenic APP rescues Hypersynchronous network activity in a mouse model of Alzheimer's  
760 disease. *J Neurosci* 34(11), 3826-3840. doi: 10.1523/JNEUROSCI.5171-13.2014.
- 761 Caceres, J., and Brandan, E. (1997). Interaction between Alzheimer's disease beta A4 precursor protein  
762 (APP) and the extracellular matrix: evidence for the participation of heparan sulfate proteoglycans.  
763 *J Cell Biochem* 65(2), 145-158.
- 764 Chen, A.C., Kim, S., Shepardson, N., Patel, S., Hong, S., and Selkoe, D.J. (2015). Physical and functional  
765 interaction between the alpha- and gamma-secretases: A new model of regulated intramembrane  
766 proteolysis. *J Cell Biol* 211(6), 1157-1176. doi: 10.1083/jcb.201502001.
- 767 Chen, A.C., and Selkoe, D.J. (2007). Response to: Pardossi-Piquard et al., "Presenilin-Dependent  
768 Transcriptional Control of the Abeta-Degrading Enzyme Nephilysin by Intracellular Domains of  
769 betaAPP and APLP." *Neuron* 46, 541-554. *Neuron* 53(4), 479-483. doi:  
770 10.1016/j.neuron.2007.01.023.
- 771 Chen, M., Wang, J., Jiang, J., Zheng, X., Justice, N.J., Wang, K., et al. (2017). APP modulates KCC2  
772 expression and function in hippocampal GABAergic inhibition. *Elife* 6. doi: 10.7554/eLife.20142.
- 773 Cousins, S.L., Hoey, S.E., Anne Stephenson, F., and Perkinson, M.S. (2009). Amyloid precursor protein  
774 695 associates with assembled NR2A- and NR2B-containing NMDA receptors to result in the  
775 enhancement of their cell surface delivery. *J Neurochem* 111(6), 1501-1513. doi: 10.1111/j.1471-  
776 4159.2009.06424.x.
- 777 Decock, M., Stanga, S., Octave, J.N., Dewachter, I., Smith, S.O., Constantinescu, S.N., et al. (2016).  
778 Glycines from the APP GXXXG/GXXXA Transmembrane Motifs Promote Formation of  
779 Pathogenic Abeta Oligomers in Cells. *Front Aging Neurosci* 8, 107. doi: 10.3389/fnagi.2016.00107.
- 780 Deyts, C., Thinakaran, G., and Parent, A.T. (2016). APP Receptor? To Be or Not To Be. *Trends Pharmacol*  
781 *Sci* 37(5), 390-411. doi: 10.1016/j.tips.2016.01.005.
- 782 Doshina, A., Gourgue, F., Onizuka, M., Opsomer, R., Wang, P., Ando, K., et al. (2017). Cortical cells reveal  
783 APP as a new player in the regulation of GABAergic neurotransmission. *Sci Rep* 7(1), 370. doi:  
784 10.1038/s41598-017-00325-2.
- 785 Dovey, H.F., John, V., Anderson, J.P., Chen, L.Z., de Saint Andrieu, P., Fang, L.Y., et al. (2001). Functional  
786 gamma-secretase inhibitors reduce beta-amyloid peptide levels in brain. *J Neurochem* 76(1), 173-  
787 181.

- 788 Fitzjohn, S.M., Morton, R.A., Kuenzi, F., Davies, C.H., Seabrook, G.R., and Collingridge, G.L. (2000).  
789 Similar levels of long-term potentiation in amyloid precursor protein -null and wild-type mice in  
790 the CA1 region of picrotoxin treated slices. *Neurosci Lett* 288(1), 9-12.
- 791 Freude, K.K., Penjwini, M., Davis, J.L., LaFerla, F.M., and Blurton-Jones, M. (2011). Soluble amyloid  
792 precursor protein induces rapid neural differentiation of human embryonic stem cells. *J Biol Chem*  
793 286(27), 24264-24274. doi: 10.1074/jbc.M111.227421.
- 794 Friedman, D., Honig, L.S., and Scarmeas, N. (2012). Seizures and epilepsy in Alzheimer's disease. *CNS*  
795 *Neurosci Ther* 18(4), 285-294. doi: 10.1111/j.1755-5949.2011.00251.x.
- 796 Grimm, M.O., Mett, J., Stahlmann, C.P., Hauptenthal, V.J., Zimmer, V.C., and Hartmann, T. (2013).  
797 Neprilysin and Abeta Clearance: Impact of the APP Intracellular Domain in NEP Regulation and  
798 Implications in Alzheimer's Disease. *Front Aging Neurosci* 5, 98. doi: 10.3389/fnagi.2013.00098.
- 799 Gueli, M.C., and Taibi, G. (2013). Alzheimer's disease: amino acid levels and brain metabolic status. *Neurol*  
800 *Sci* 34(9), 1575-1579. doi: 10.1007/s10072-013-1289-9.
- 801 Guo, Q., Wang, Z., Li, H., Wiese, M., and Zheng, H. (2012). APP physiological and pathophysiological  
802 functions: insights from animal models. *Cell Res* 22(1), 78-89. doi: 10.1038/cr.2011.116.
- 803 Hage, S., Marinangeli, C., Stanga, S., Octave, J.N., Quetin-Leclercq, J., and Kienlen-Campard, P. (2014).  
804 Gamma-secretase inhibitor activity of a Pterocarpus erinaceus extract. *Neurodegener Dis* 14(1), 39-  
805 51. doi: 10.1159/000355557.
- 806 Hendrickx A, Pierrot N, Tasiaux B, Schakman O, Brion JP, Kienlen-Campard P, De SC, Octave JN (2013)  
807 Epigenetic Induction of EGR-1 Expression by the Amyloid Precursor Protein during Exposure to  
808 Novelty. *PLoS One* 8:e74305.
- 809 Hebert, S.S., Serneels, L., Tolia, A., Craessaerts, K., Derks, C., Filippov, M.A., et al. (2006). Regulated  
810 intramembrane proteolysis of amyloid precursor protein and regulation of expression of putative  
811 target genes. *EMBO Rep* 7(7), 739-745. doi: 10.1038/sj.embor.7400704.
- 812 Heckl, D., Kowalczyk, M.S., Yudovich, D., Belizaire, R., Puram, R.V., McConkey, M.E., et al. (2014).  
813 Generation of mouse models of myeloid malignancy with combinatorial genetic lesions using  
814 CRISPR-Cas9 genome editing. *Nat Biotechnol* 32(9), 941-946. doi: 10.1038/nbt.2951.
- 815 Hicks, D.A., Makova, N.Z., Gough, M., Parkin, E.T., Nalivaeva, N.N., and Turner, A.J. (2013). The amyloid  
816 precursor protein represses expression of acetylcholinesterase in neuronal cell lines. *J Biol Chem*  
817 288(36), 26039-26051. doi: 10.1074/jbc.M113.461269.
- 818 Hoe, H.S., Fu, Z., Makarova, A., Lee, J.Y., Lu, C., Feng, L., et al. (2009a). The effects of amyloid precursor  
819 protein on postsynaptic composition and activity. *J Biol Chem* 284(13), 8495-8506. doi:  
820 10.1074/jbc.M900141200.
- 821 Hoe, H.S., Lee, K.J., Carney, R.S., Lee, J., Markova, A., Lee, J.Y., et al. (2009b). Interaction of reelin with  
822 amyloid precursor protein promotes neurite outgrowth. *J Neurosci* 29(23), 7459-7473. doi:  
823 10.1523/JNEUROSCI.4872-08.2009.
- 824 Hsieh, H., Boehm, J., Sato, C., Iwatsubo, T., Tomita, T., Sisodia, S., et al. (2006). AMPAR removal  
825 underlies Abeta-induced synaptic depression and dendritic spine loss. *Neuron* 52(5), 831-843. doi:  
826 10.1016/j.neuron.2006.10.035.
- 827 Hu, Y., Hung, A.C., Cui, H., Dawkins, E., Bolos, M., Foa, L., et al. (2013). Role of cystatin C in amyloid  
828 precursor protein-induced proliferation of neural stem/progenitor cells. *J Biol Chem* 288(26),  
829 18853-18862. doi: 10.1074/jbc.M112.443671.
- 830 Huysseune, S., Kienlen-Campard, P., and Octave, J.N. (2007). Fe65 does not stabilize AICD during  
831 activation of transcription in a luciferase assay. *Biochem Biophys Res Commun* 361(2), 317-322.  
832 doi: 10.1016/j.bbrc.2007.06.186.
- 833 Jinek, M., Chylinski, K., Fonfara, I., Hauer, M., Doudna, J.A., and Charpentier, E. (2012). A programmable  
834 dual-RNA-guided DNA endonuclease in adaptive bacterial immunity. *Science* 337(6096), 816-821.  
835 doi: 10.1126/science.1225829.
- 836 Kamenetz, F., Tomita, T., Hsieh, H., Seabrook, G., Borchelt, D., Iwatsubo, T., et al. (2003). APP processing  
837 and synaptic function. *Neuron* 37(6), 925-937.



- 838 Kanehisa, M., and Goto, S. (2000). KEGG: kyoto encyclopedia of genes and genomes. *Nucleic Acids Res*  
839 28(1), 27-30.
- 840 Kimberly, W.T., Zheng, J.B., Town, T., Flavell, R.A., and Selkoe, D.J. (2005). Physiological regulation of  
841 the beta-amyloid precursor protein signaling domain by c-Jun N-terminal kinase JNK3 during  
842 neuronal differentiation. *J Neurosci* 25(23), 5533-5543. doi: 10.1523/JNEUROSCI.4883-04.2005.
- 843 Klevanski, M., Herrmann, U., Weyer, S.W., Fol, R., Cartier, N., Wolfer, D.P., et al. (2015). The APP  
844 Intracellular Domain Is Required for Normal Synaptic Morphology, Synaptic Plasticity, and  
845 Hippocampus-Dependent Behavior. *J Neurosci* 35(49), 16018-16033. doi:  
846 10.1523/JNEUROSCI.2009-15.2015.
- 847 Lassek, M., Weingarten, J., Wegner, M., Neupartl, M., Array, T.N., Harde, E., et al. (2017). APP Deletion  
848 Accounts for Age-Dependent Changes in the Bioenergetic Metabolism and in Hyperphosphorylated  
849 CaMKII at Stimulated Hippocampal Presynaptic Active Zones. *Front Synaptic Neurosci* 9, 1. doi:  
850 10.3389/fnsyn.2017.00001.
- 851 Lee, K.J., Moussa, C.E., Lee, Y., Sung, Y., Howell, B.W., Turner, R.S., et al. (2010). Beta amyloid-  
852 independent role of amyloid precursor protein in generation and maintenance of dendritic spines.  
853 *Neuroscience* 169(1), 344-356. doi: 10.1016/j.neuroscience.2010.04.078.
- 854 Leslie, J.H., and Nedivi, E. (2011). Activity-regulated genes as mediators of neural circuit plasticity. *Prog*  
855 *Neurobiol* 94(3), 223-237. doi: 10.1016/j.pneurobio.2011.05.002.
- 856 Lin, Y., Bloodgood, B.L., Hauser, J.L., Lapan, A.D., Koon, A.C., Kim, T.K., et al. (2008). Activity-  
857 dependent regulation of inhibitory synapse development by Npas4. *Nature* 455(7217), 1198-1204.  
858 doi: 10.1038/nature07319.
- 859 Loebrich, S., and Nedivi, E. (2009). The function of activity-regulated genes in the nervous system. *Physiol*  
860 *Rev* 89(4), 1079-1103. doi: 10.1152/physrev.00013.2009.
- 861 Milosch, N., Tanriover, G., Kundu, A., Rami, A., Francois, J.C., Baumkotter, F., et al. (2014). Holo-APP  
862 and G-protein-mediated signaling are required for sAPPalpha-induced activation of the Akt survival  
863 pathway. *Cell Death Dis* 5, e1391. doi: 10.1038/cddis.2014.352.
- 864 Miyashita, A., Hatsuta, H., Kikuchi, M., Nakaya, A., Saito, Y., Tsukie, T., et al. (2014). Genes associated  
865 with the progression of neurofibrillary tangles in Alzheimer's disease. *Transl Psychiatry* 4, e396.  
866 doi: 10.1038/tp.2014.35.
- 867 Muller, U., Cristina, N., Li, Z.W., Wolfer, D.P., Lipp, H.P., Rulicke, T., et al. (1994). Behavioral and  
868 anatomical deficits in mice homozygous for a modified beta-amyloid precursor protein gene. *Cell*  
869 79(5), 755-765.
- 870 Muller, U.C., Deller, T., and Korte, M. (2017). Not just amyloid: physiological functions of the amyloid  
871 precursor protein family. *Nat Rev Neurosci* 18(5), 281-298. doi: 10.1038/nrn.2017.29.
- 872 Muller, U.C., Pietrzik, C.U., and Deller, T. (2012). The physiological functions of the beta-amyloid  
873 precursor protein APP. *Exp Brain Res* 217(3-4), 325-329. doi: 10.1007/s00221-012-3039-2.
- 874 Muller, U.C., and Zheng, H. (2012). Physiological functions of APP family proteins. *Cold Spring Harb*  
875 *Perspect Med* 2(2), a006288. doi: 10.1101/cshperspect.a006288.
- 876 Pardossi-Piquard, R., and Checler, F. (2012). The physiology of the beta-amyloid precursor protein  
877 intracellular domain AICD. *J Neurochem* 120 Suppl 1, 109-124. doi: 10.1111/j.1471-  
878 4159.2011.07475.x.
- 879 Pickering, M., Pickering, B.W., Murphy, K.J., and O'Connor, J.J. (2008). Discrimination of cell types in  
880 mixed cortical culture using calcium imaging: a comparison to immunocytochemical labeling. *J*  
881 *Neurosci Methods* 173(1), 27-33. doi: 10.1016/j.jneumeth.2008.05.014.
- 882 Pierrot, N., Tyteca, D., D'Auria, L., Dewachter, I., Gailly, P., Hendrickx, A., et al. (2013). Amyloid  
883 precursor protein controls cholesterol turnover needed for neuronal activity. *EMBO Mol Med* 5(4),  
884 608-625. doi: 10.1002/emmm.201202215.
- 885 Priller, C., Bauer, T., Mitteregger, G., Krebs, B., Kretschmar, H.A., and Herms, J. (2006). Synapse  
886 formation and function is modulated by the amyloid precursor protein. *J Neurosci* 26(27), 7212-  
887 7221. doi: 10.1523/JNEUROSCI.1450-06.2006.

- 888 Puzzo, D., Privitera, L., Fa, M., Staniszewski, A., Hashimoto, G., Aziz, F., et al. (2011). Endogenous  
889 amyloid-beta is necessary for hippocampal synaptic plasticity and memory. *Ann Neurol* 69(5), 819-  
890 830. doi: 10.1002/ana.22313.
- 891 Restituito, S., Khatri, L., Ninan, I., Mathews, P.M., Liu, X., Weinberg, R.J., et al. (2011). Synaptic  
892 autoregulation by metalloproteases and gamma-secretase. *J Neurosci* 31(34), 12083-12093. doi:  
893 10.1523/JNEUROSCI.2513-11.2011.
- 894 Ring, S., Weyer, S.W., Kilian, S.B., Waldron, E., Pietrzik, C.U., Filippov, M.A., et al. (2007). The secreted  
895 beta-amyloid precursor protein ectodomain APPs alpha is sufficient to rescue the anatomical,  
896 behavioral, and electrophysiological abnormalities of APP-deficient mice. *J Neurosci* 27(29), 7817-  
897 7826. doi: 10.1523/JNEUROSCI.1026-07.2007.
- 898 Ritchie, M.E., Phipson, B., Wu, D., Hu, Y., Law, C.W., Shi, W., et al. (2015). limma powers differential  
899 expression analyses for RNA-sequencing and microarray studies. *Nucleic Acids Res* 43(7), e47. doi:  
900 10.1093/nar/gkv007.
- 901 Santos, S.F., Pierrot, N., Morel, N., Gailly, P., Sindic, C., and Octave, J.N. (2009). Expression of human  
902 amyloid precursor protein in rat cortical neurons inhibits calcium oscillations. *J Neurosci* 29(15),  
903 4708-4718. doi: 10.1523/JNEUROSCI.4917-08.2009.
- 904 Seabrook, G.R., Smith, D.W., Bowery, B.J., Easter, A., Reynolds, T., Fitzjohn, S.M., et al. (1999).  
905 Mechanisms contributing to the deficits in hippocampal synaptic plasticity in mice lacking amyloid  
906 precursor protein. *Neuropharmacology* 38(3), 349-359.
- 907 Senechal, Y., Kelly, P.H., Cryan, J.F., Natt, F., and Dev, K.K. (2007). Amyloid precursor protein  
908 knockdown by siRNA impairs spontaneous alternation in adult mice. *J Neurochem* 102(6), 1928-  
909 1940. doi: 10.1111/j.1471-4159.2007.04672.x.
- 910 Shariati, S.A., and De Strooper, B. (2013). Redundancy and divergence in the amyloid precursor protein  
911 family. *FEBS Lett* 587(13), 2036-2045. doi: 10.1016/j.febslet.2013.05.026.
- 912 Sim, S., Antolin, S., Lin, C.W., Lin, Y., and Lois, C. (2013). Increased cell-intrinsic excitability induces  
913 synaptic changes in new neurons in the adult dentate gyrus that require Npas4. *J Neurosci* 33(18),  
914 7928-7940. doi: 10.1523/JNEUROSCI.1571-12.2013.
- 915 Snyder, E.M., Nong, Y., Almeida, C.G., Paul, S., Moran, T., Choi, E.Y., et al. (2005). Regulation of NMDA  
916 receptor trafficking by amyloid-beta. *Nat Neurosci* 8(8), 1051-1058. doi: 10.1038/nn1503.
- 917 Spiegel, I., Mardinly, A.R., Gabel, H.W., Bazinet, J.E., Couch, C.H., Tzeng, C.P., et al. (2014). Npas4  
918 regulates excitatory-inhibitory balance within neural circuits through cell-type-specific gene  
919 programs. *Cell* 157(5), 1216-1229. doi: 10.1016/j.cell.2014.03.058.
- 920 Stanga, S., Zanou, N., Audouard, E., Tasiaux, B., Contino, S., Vandermeulen, G., et al. (2016). APP-  
921 dependent glial cell line-derived neurotrophic factor gene expression drives neuromuscular junction  
922 formation. *FASEB J* 30(5), 1696-1711. doi: 10.1096/fj.15-278739.
- 923 Sun, X., and Lin, Y. (2016). Npas4: Linking Neuronal Activity to Memory. *Trends Neurosci* 39(4), 264-  
924 275. doi: 10.1016/j.tins.2016.02.003.
- 925 Tyan, S.H., Shih, A.Y., Walsh, J.J., Maruyama, H., Sarsoza, F., Ku, L., et al. (2012). Amyloid precursor  
926 protein (APP) regulates synaptic structure and function. *Mol Cell Neurosci* 51(1-2), 43-52. doi:  
927 10.1016/j.mcn.2012.07.009.
- 928 Waldron, E., Isbert, S., Kern, A., Jaeger, S., Martin, A.M., Hebert, S.S., et al. (2008). Increased AICD  
929 generation does not result in increased nuclear translocation or activation of target gene  
930 transcription. *Exp Cell Res* 314(13), 2419-2433. doi: 10.1016/j.yexcr.2008.05.003.
- 931 West, A.E., and Greenberg, M.E. (2011). Neuronal activity-regulated gene transcription in synapse  
932 development and cognitive function. *Cold Spring Harb Perspect Biol* 3(6). doi:  
933 10.1101/cshperspect.a005744.
- 934 Weyer, S.W., Zagrebelsky, M., Herrmann, U., Hick, M., Ganss, L., Gobbert, J., et al. (2014). Comparative  
935 analysis of single and combined APP/APLP knockouts reveals reduced spine density in APP-KO  
936 mice that is prevented by APPsalpha expression. *Acta Neuropathol Commun* 2, 36. doi:  
937 10.1186/2051-5960-2-36.

- 938 White, A.R., Zheng, H., Galatis, D., Maher, F., Hesse, L., Multhaup, G., et al. (1998). Survival of cultured  
939 neurons from amyloid precursor protein knock-out mice against Alzheimer's amyloid-beta toxicity  
940 and oxidative stress. *J Neurosci* 18(16), 6207-6217.
- 941 Wu, D., Lim, E., Vaillant, F., Asselin-Labat, M.L., Visvader, J.E., and Smyth, G.K. (2010). ROAST:  
942 rotation gene set tests for complex microarray experiments. *Bioinformatics* 26(17), 2176-2182. doi:  
943 10.1093/bioinformatics/btq401.
- 944 Young-Pearse, T.L., Bai, J., Chang, R., Zheng, J.B., LoTurco, J.J., and Selkoe, D.J. (2007). A critical  
945 function for beta-amyloid precursor protein in neuronal migration revealed by in utero RNA  
946 interference. *J Neurosci* 27(52), 14459-14469. doi: 10.1523/JNEUROSCI.4701-07.2007.
- 947 Zheng, H., Jiang, M., Trumbauer, M.E., Sirinathsinghji, D.J., Hopkins, R., Smith, D.W., et al. (1995). beta-  
948 Amyloid precursor protein-deficient mice show reactive gliosis and decreased locomotor activity.  
949 *Cell* 81(4), 525-531.
- 950 Zou, C., Crux, S., Marinesco, S., Montagna, E., Sgobio, C., Shi, Y., et al. (2016). Amyloid precursor protein  
951 maintains constitutive and adaptive plasticity of dendritic spines in adult brain by regulating D-  
952 serine homeostasis. *EMBO J* 35(20), 2213-2222. doi: 10.15252/embj.201694085.

953

Figure 1

A

Up- and down-regulated genes

| Linear fold change | E18 |      | DIV3 |      | DIV7 |      |
|--------------------|-----|------|------|------|------|------|
|                    | Up  | Down | Up   | Down | Up   | Down |
| ≥ 1,25             | 90  | 35   | 93   | 54   | 73   | 56   |
| ≥ 1,5              | 16  | 4    | 5    | 6    | 4    | 3    |
| ≥ 2                | 4   | 1    | 2    | 3    | 0    | 2    |

C

| DIV7                         | Gene symbol         | Fold change * |
|------------------------------|---------------------|---------------|
| Immediate Early Genes (IEGs) | <i>App</i>          | 0,05          |
|                              | <i>Ier2</i>         | 0,52          |
|                              | <i>Arc</i>          | 0,56          |
|                              | <b><i>Npas4</i></b> | <b>0,57</b>   |
|                              | <i>Fosb</i>         | 0,57          |
|                              | <i>Fos</i>          | 0,60          |
|                              | <i>Egr1</i>         | 0,66          |
|                              | <i>Egr2</i>         | 0,74          |
|                              | <i>Egr3</i>         | 0,77          |
|                              | <i>Egr4</i>         | 0,78          |

\* linear fold change (*APP*<sup>-/-</sup> vs. *APP*<sup>+/+</sup>)

B

KEGG Pathways

|                                                       | Nb. Genes | Direction   |
|-------------------------------------------------------|-----------|-------------|
| <b>E18</b>                                            |           |             |
| Base excision repair                                  | 32        | Up          |
| p53 signaling pathway                                 | 70        | Up          |
| Terpenoid backbone biosynthesis                       | 14        | Down        |
| Small cell lung cancer                                | 88        | Up          |
| Pyrimidine metabolism                                 | 96        | Up          |
| <b>DIV3</b>                                           |           |             |
| Proteasome                                            | 42        | Up          |
| RIG-I-like receptor signaling pathway                 | 67        | Down        |
| Terpenoid backbone biosynthesis                       | 14        | Up          |
| Glycosaminoglycan biosynthesis                        | 14        | Up          |
| Steroid biosynthesis                                  | 17        | Up          |
| <b>DIV7</b>                                           |           |             |
| Homologous recombination                              | 26        | Down        |
| Glycosylphosphatidylinositol(GPI)-anchor biosynthesis | 23        | Down        |
| Glycosaminoglycan biosynthesis - keratan sulfate      | 14        | Up          |
| <b><i>ECM-receptor interaction</i></b>                | <b>83</b> | <b>Down</b> |
| <b><i>Long-term potentiation</i></b>                  | <b>64</b> | <b>Up</b>   |

D

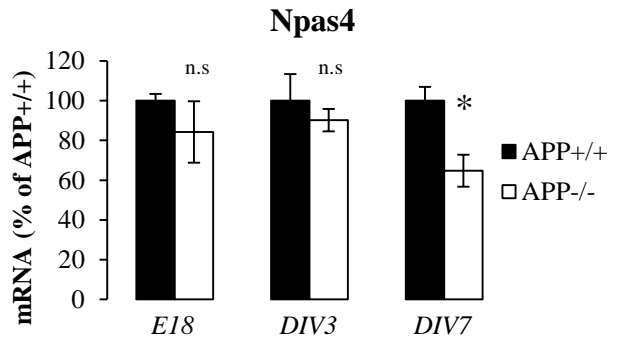

Figure 2

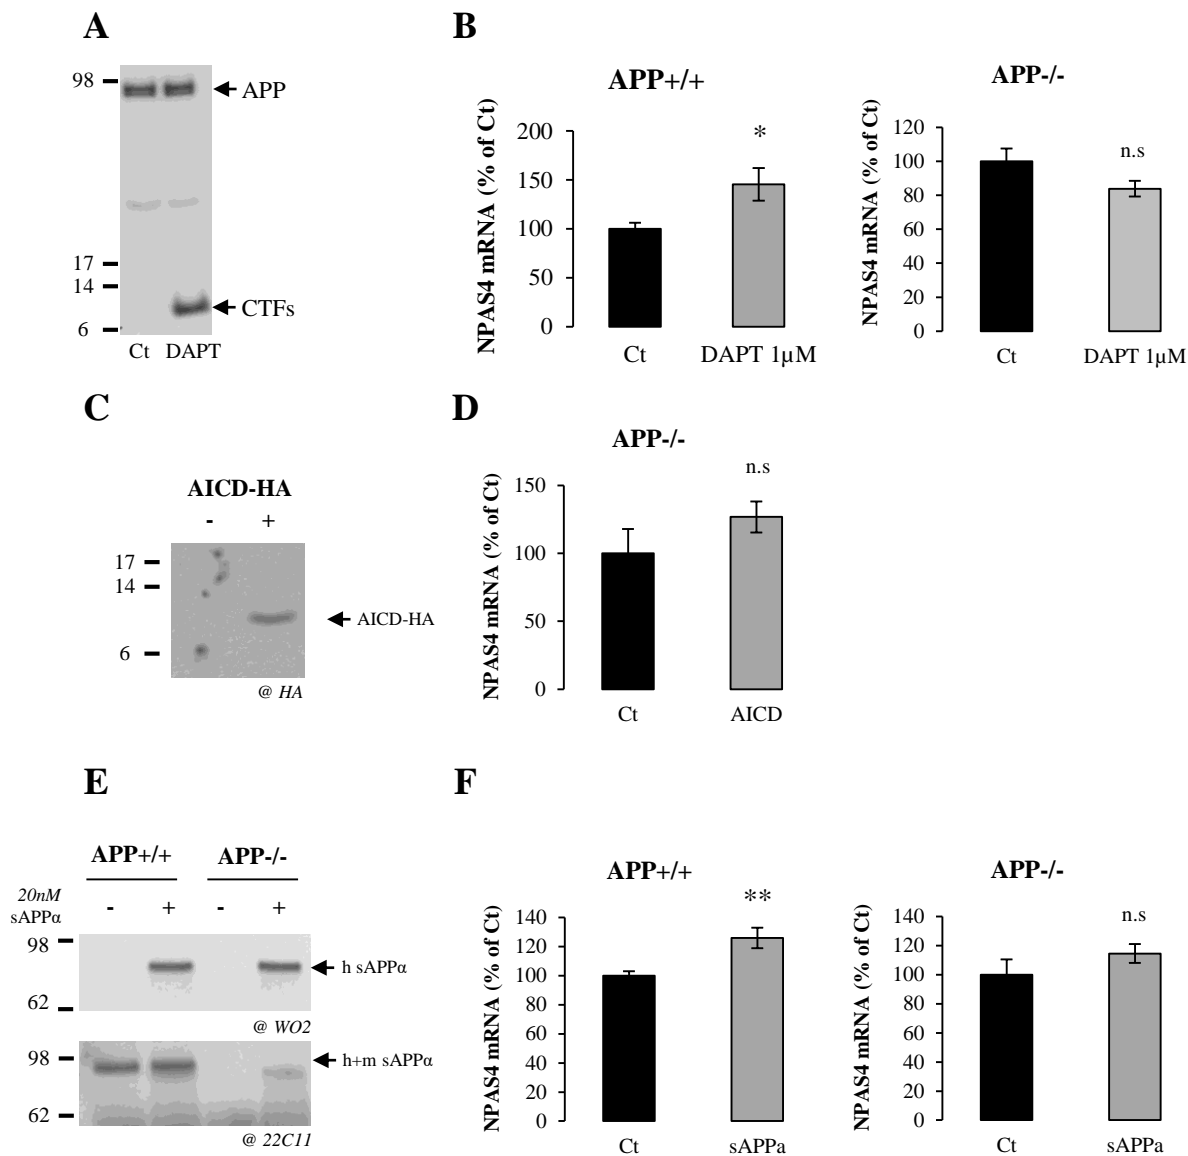

# Figure 3

**A**

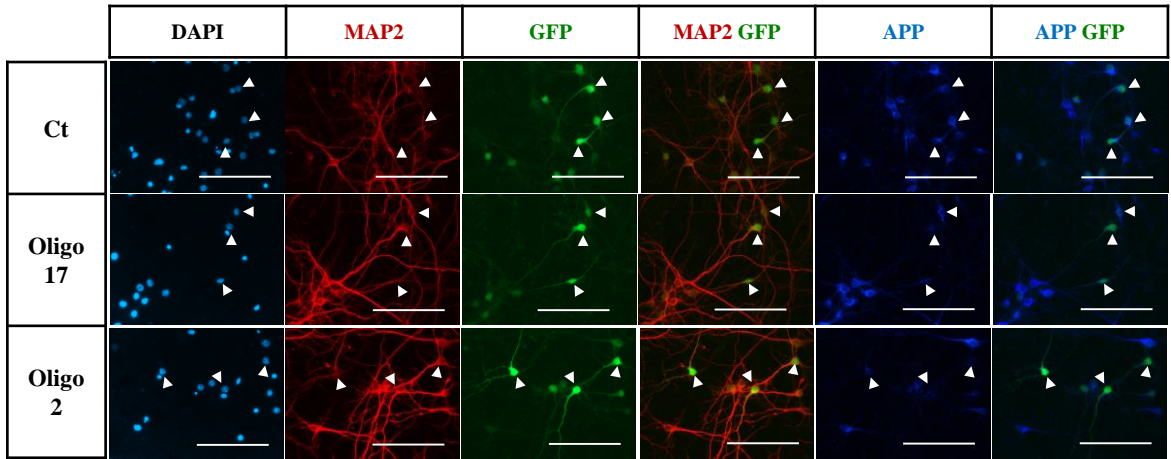

**B**

APP signal intensity in GFP-positive neurons

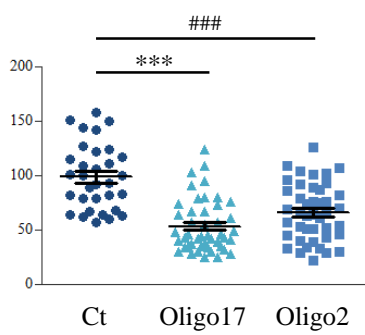

**C**

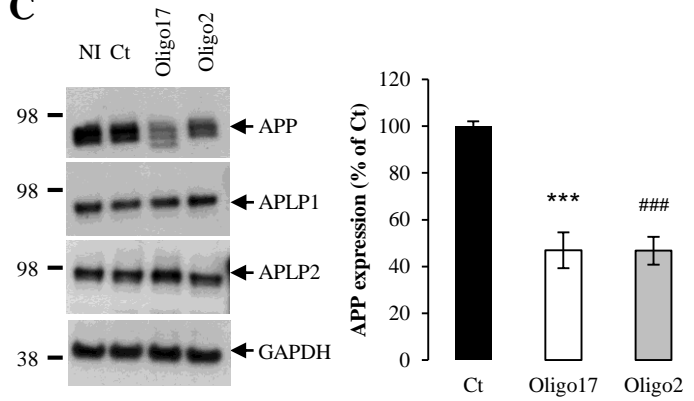

**D**

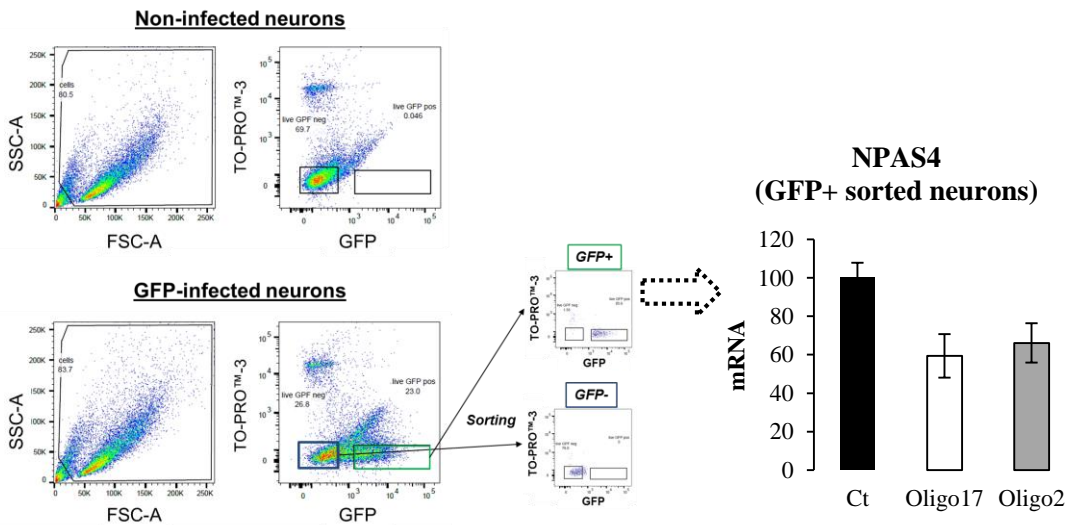



Figure 4

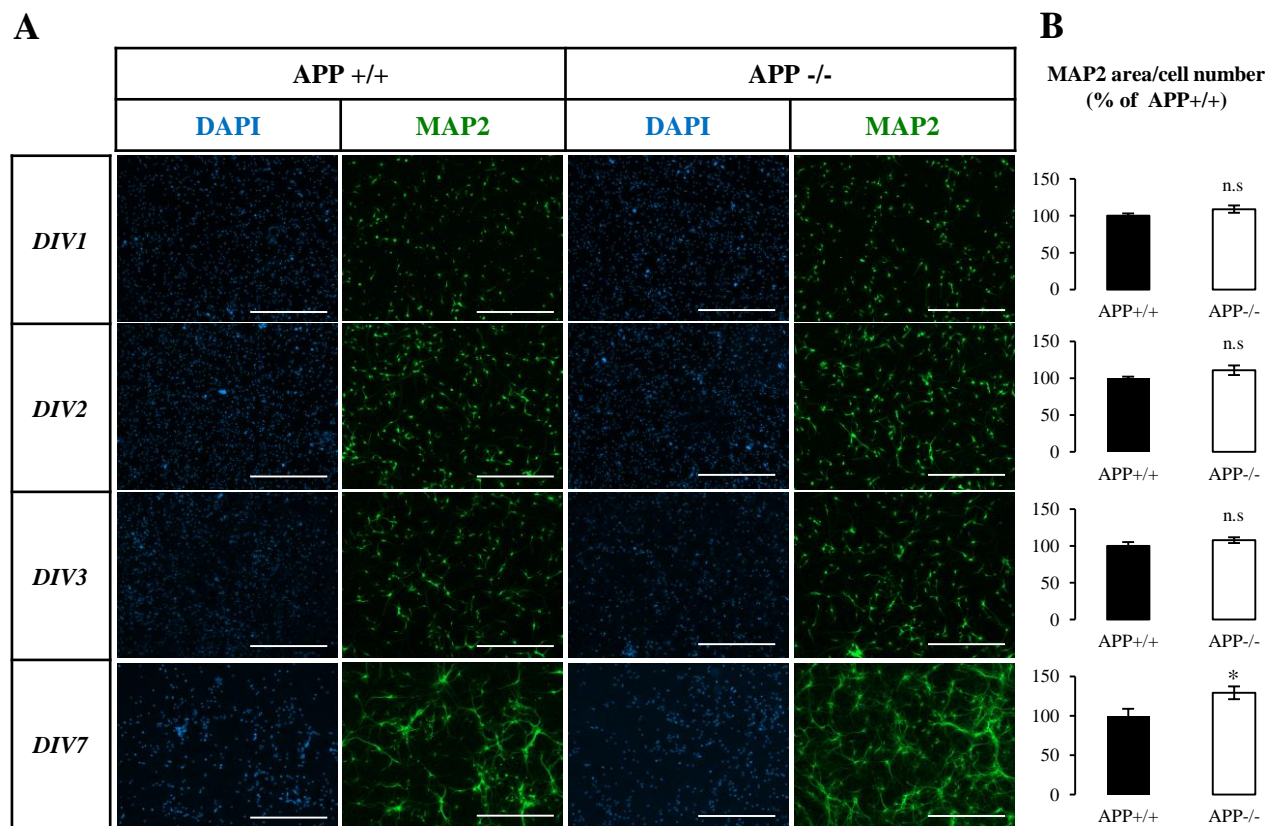

Figure 5

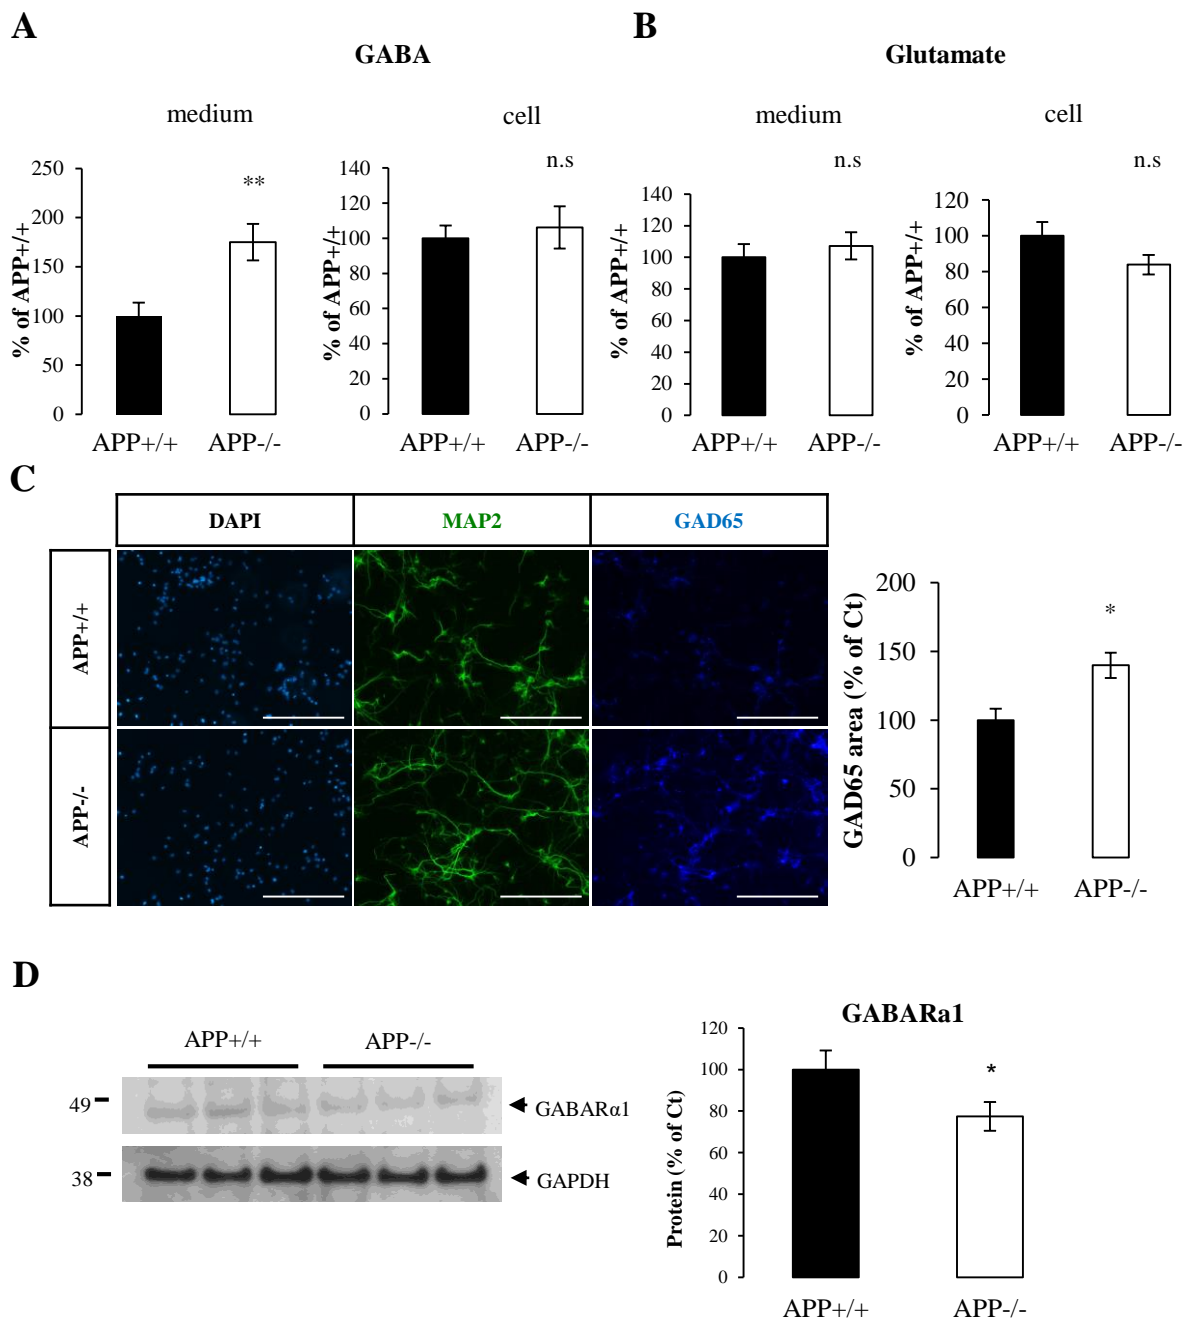

Figure 6

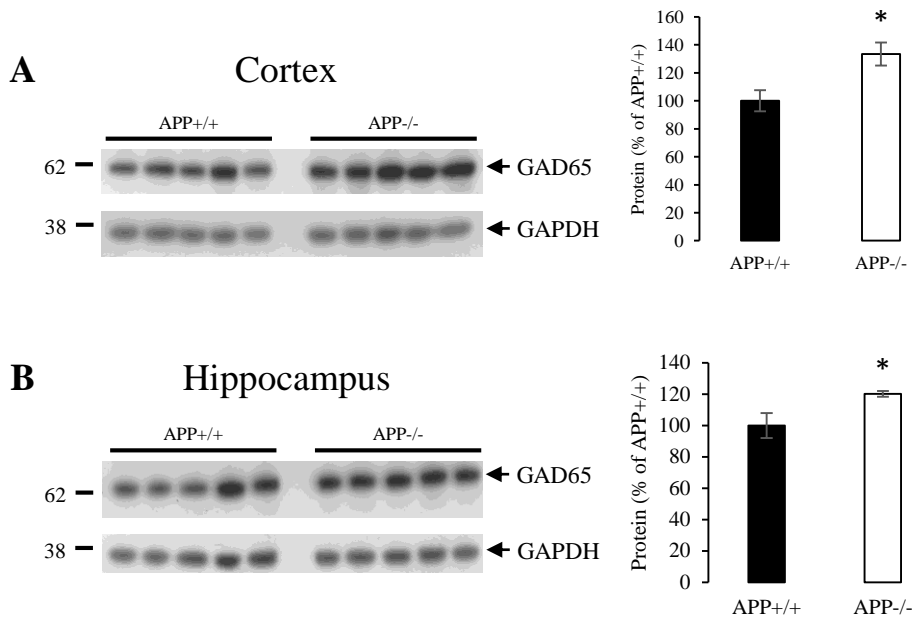

# Figure 7

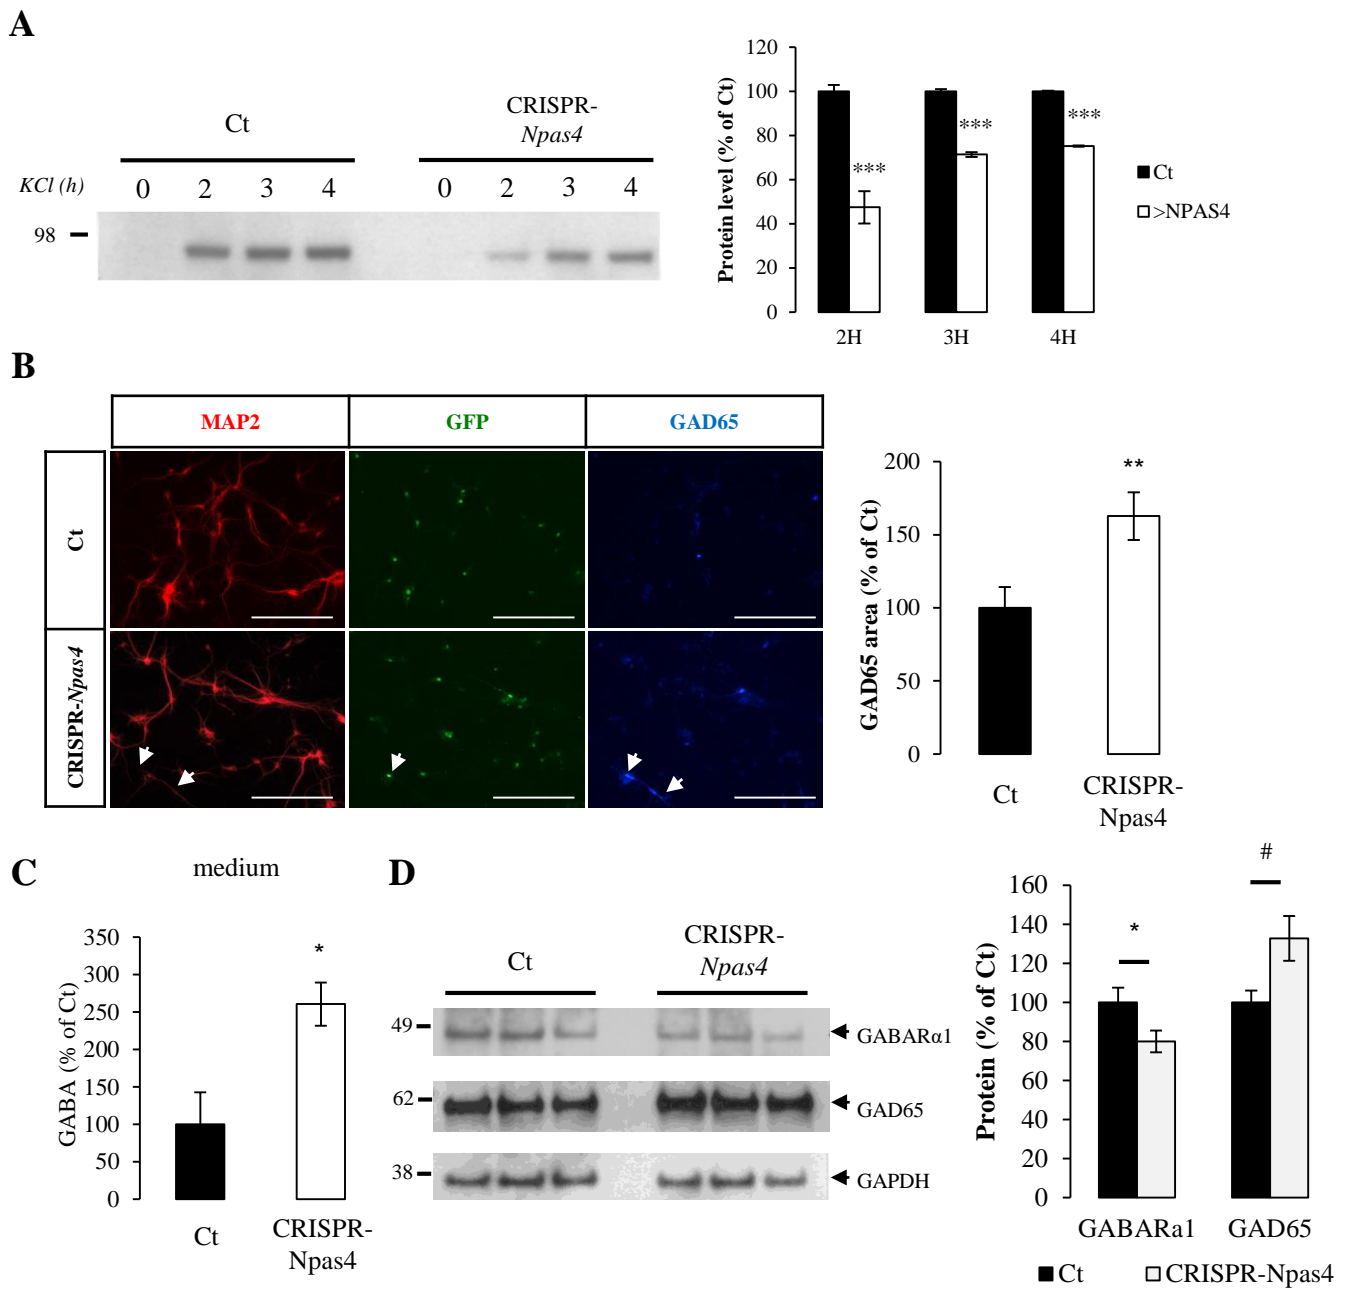

## Supplemental Figure 1: Experimental Workflow and model characterization

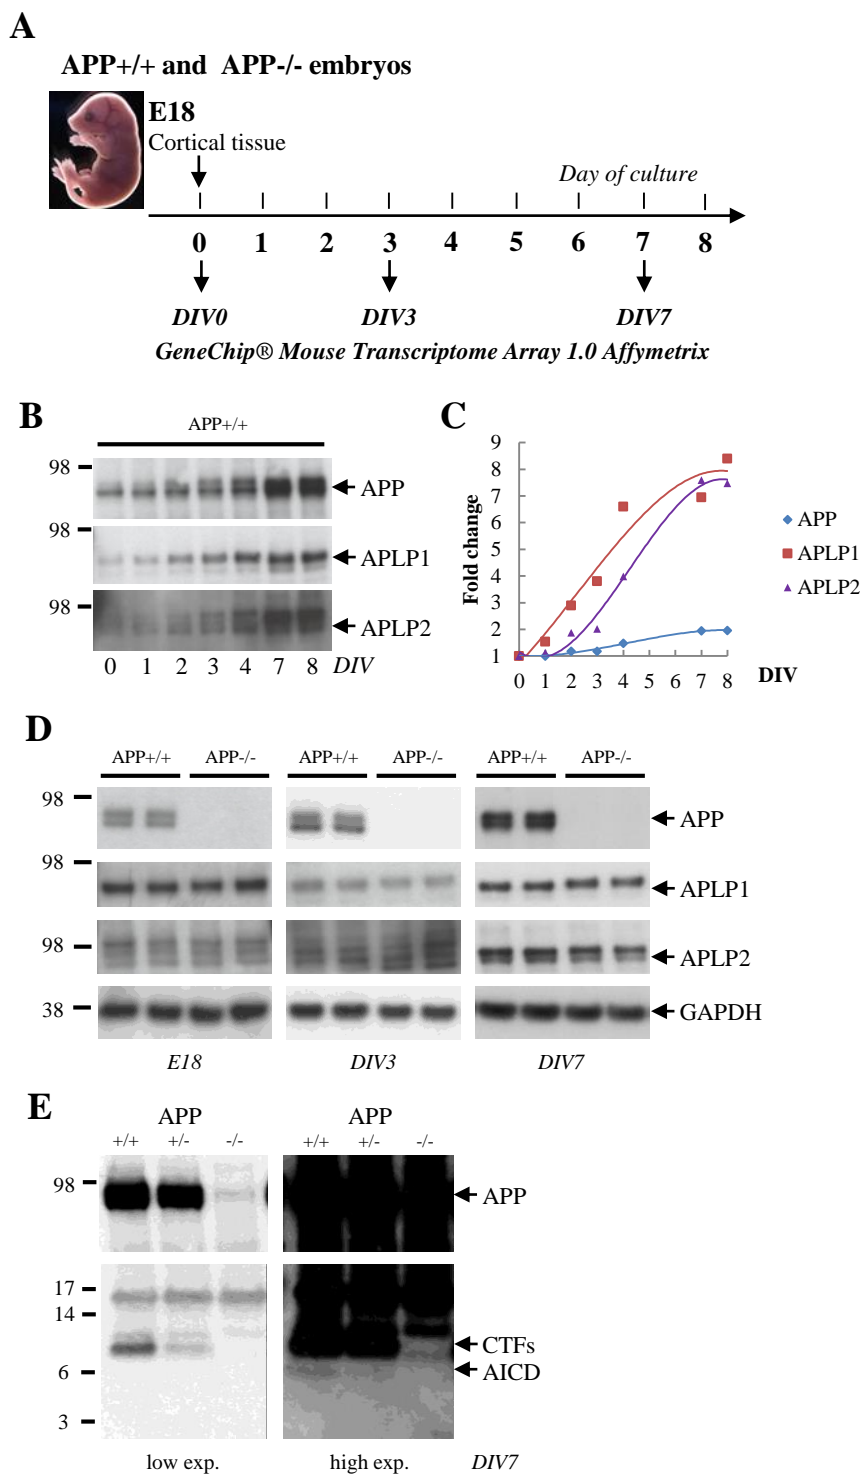

**Figure S1: Experimental workflow and model characterization**

A) Experimental design used for the study. Cortical tissue was taken at embryonic day 18 (E18); neurons were cultured and experiments were mainly carried out after 3 and 7 days in vitro (DIV3 and DIV7). Transcriptome analysis was performed on embryonic cortex (E18) and at DIV3 or DIV7. **B**) APP, APLP1 and APLP2 expressions were analyzed by Western blotting at the indicated days of culture in APP<sup>+/+</sup> neurons. **C**) Quantification of APP, APLP1 and APLP2 expression over time in APP<sup>+/+</sup> neurons. Accumulation is represented as fold change over the signal measured at day 0. Quantification was performed from one neuronal culture **D**) APLP1 and APLP2 expressions are not modified in cortical tissue at E18 and primary neuron cultures at DIV3 and DIV 7. Expression of APP, APLP1, APLP2 was analyzed by Western blotting of cells lysates from APP<sup>+/+</sup> and APP<sup>-/-</sup> primary neuron cultures. **E**) Samples from primary cultures at DIV7 (APP<sup>+/+</sup>, APP<sup>+/-</sup> and APP<sup>-/-</sup> neurons) were probed (Western blotting) with an antibody directed against APP C-terminus for APP C-terminal fragments (CTFs) and AICD. Low and high exposures of a typical blot are shown. Arrows indicate the expected position of APP holoprotein, APP CTFs and AICD.

## Supplemental Figure 2 : Egr1 and Egr3 expressions are not modified in APP deficient neurons

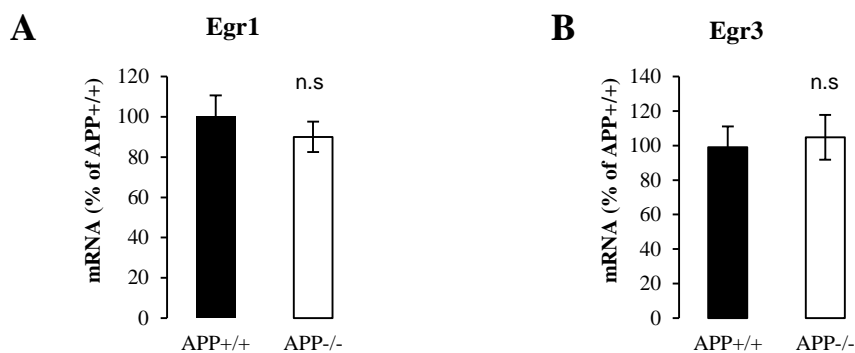

### **Figure S2: Egr1 and Egr3 expressions are not modified in APP deficient neurons**

Egr1 and Egr3 expressions were evaluated in APP+/+ vs. APP-/- primary neurons at DIV7. **A**) Egr1 mRNA level was measured by qPCR (n=6, N=3) at DIV7. Results (mean  $\pm$  SEM) are given as percentage of controls (APP+/+) n.s.= non-significant, Student's t-test. **B**) Egr3 mRNA level was measured by qPCR (n=6, N=3) at DIV7. Results (mean  $\pm$  SEM) are given as percentage of controls (APP+/+) n.s.= non-significant, Student's t-test.



## Supplemental Figure 3: Astrocytes and Npas4 expression

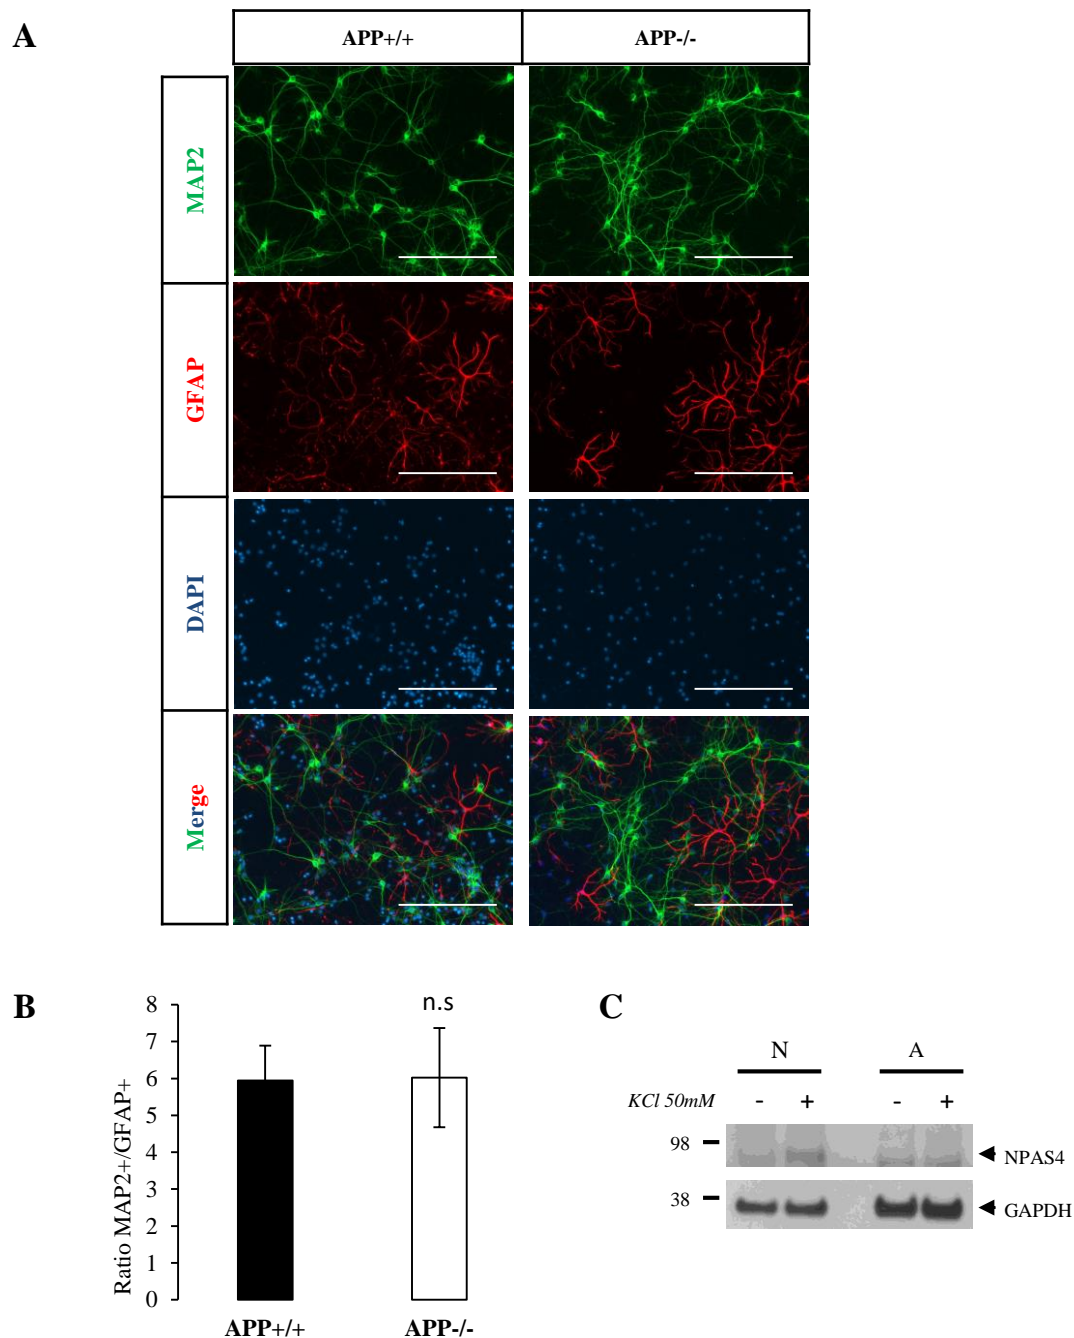

**Figure S3: Astrocytes in primary neuron culture and their implication in Npas4 expression.**

**A)** Primary culture of cortical neurons at DIV7. Cultures were immunostained with the neuron specific protein MAP2 (green), the glial specific protein GFAP (red) and the DAPI (light blue). Scale bar = 400 $\mu$ m. **B)** Quantification of neurons (MAP2<sup>+</sup>) and astrocytes (GFAP<sup>+</sup>) in the primary cortical culture. At least five fields per coverslip were analyzed for APP<sup>+/+</sup> and APP<sup>-/-</sup> cultures in two independent experiments (n $\geq$ 5, N=2). Results are expressed as the ratio of MAP2<sup>+</sup> (neurons) and GFAP<sup>+</sup> (astrocytes) (mean  $\pm$  s.e.m). n.s= non-significant, Mann-Whitney test. **C)** Western blotting analysis of Npas4 induction in neurons (N) and astrocytes (A) after depolarization with 50mM potassium chloride (KCl) for 2 hours.

## Supplemental Figure 4: Infectivity and toxicity of lentiviral CRISPR-Cas9 vectors

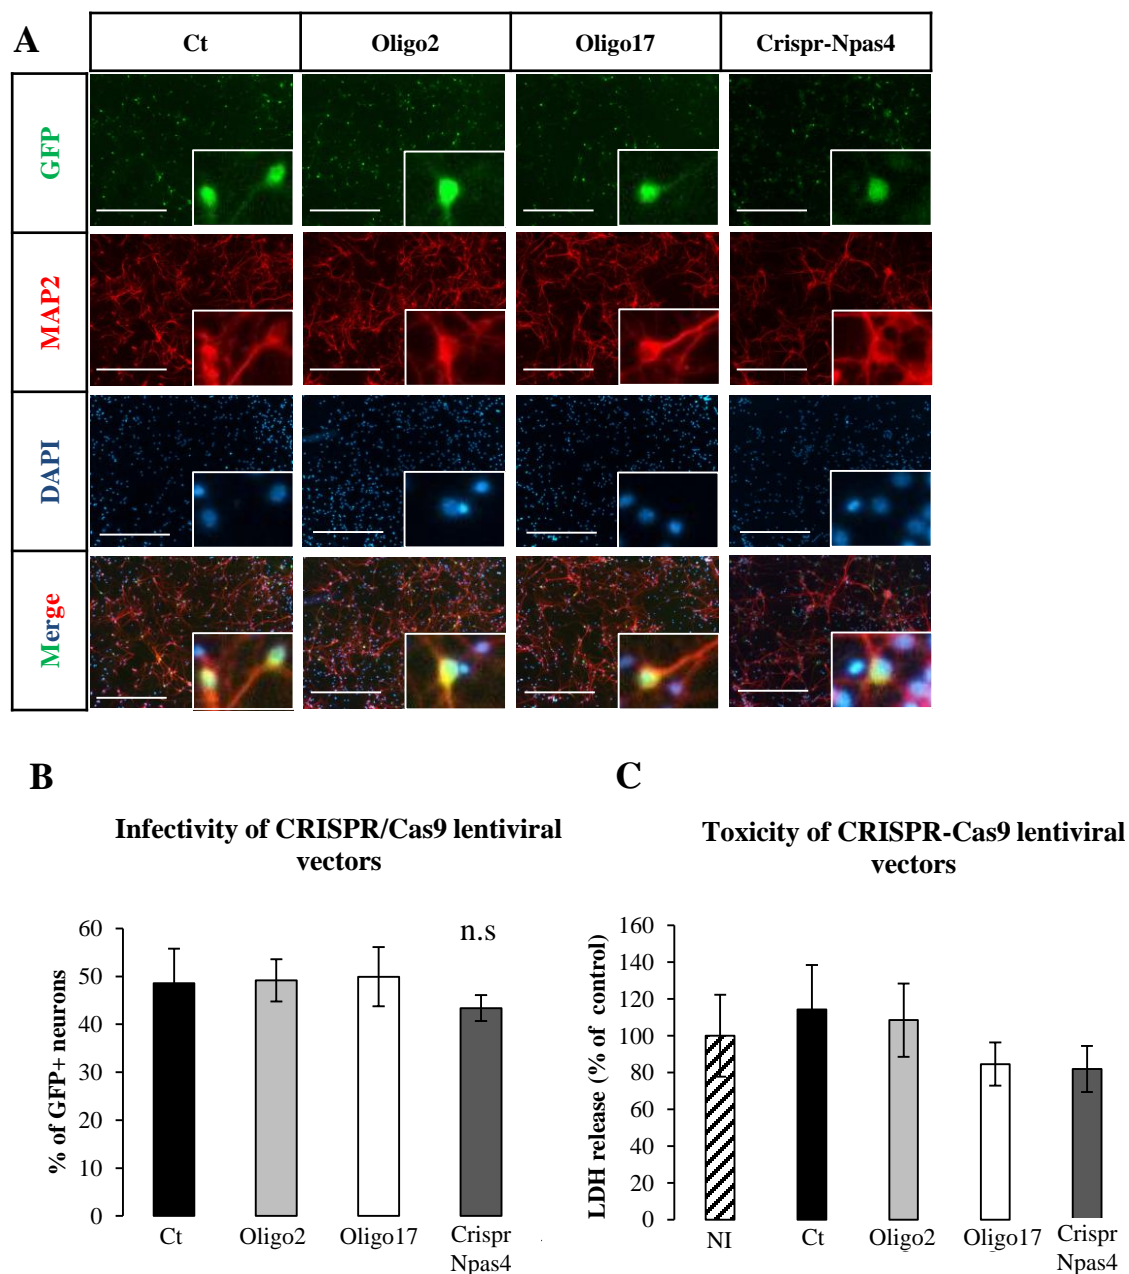

### Figure S4: Infectivity and toxicity of lentiviral CRISPR-Cas9 vectors

**A**) Cortical neurons were infected at DIV1 with lentiviruses expressing sgRNAs (Oligo2, Oligo17 or CRISPR-*Npas4*) or no sgRNA (Ct), SpCas9 and GFP. Cultures were immunostained for MAP2 (red) and DAPI (light blue) at DIV7. Scale bar = 400 $\mu$ m. **B**) Quantification of GFP+ neurons (GFP+/MAP2+) in total neuron population (MAP2+) after lentiviral CRISPR-Cas9 infection with control (Ct), Oligo2, Oligo17 or CRISPR-*Npas4*. At least five fields were analyzed for each lentiviral vector in two independent experiments ( $n \geq 5$ ,  $N = 2$ ). Results are expressed as percentage of GFP+/MAP2+ cells in total MAP2+ cells (mean  $\pm$  s.e.m). n.s= non-significant, Kruskal-Wallis test and Dunn's multiple comparison test. **C**) Measurement of LDH activity released after infection (DIV7) of primary neuron with control (Ct), Oligo2, Oligo17 or CRISPR-*Npas4* at DIV7 lentiviral vectors. Background LDH release was determined in non-infected control cultures (NI). Results were expressed as percentage of total LDH release measured in non-infected control cultures (NI) in 2 independent experiments ( $n = 12$ ,  $N = 2$ ).

## Supplemental Figure 5: Weak modification of glutamate responses in APP<sup>-/-</sup> neurons

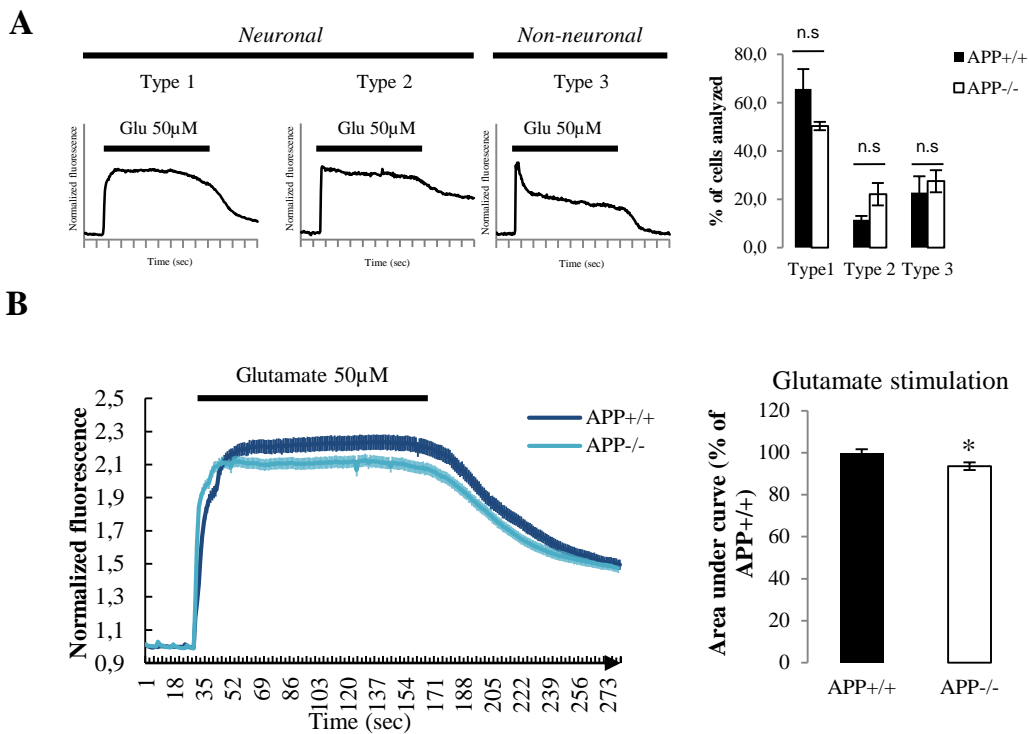

**Figure S6: Modification in glutamate responses in APP<sup>-/-</sup> neurons measured by intracellular calcium imaging.** Neuronal activity was measured at DIV7 by calcium imaging. A) Left panel. Different calcium responses were observed after stimulation with 50  $\mu$ M glutamate and classified as described by Prickering and co-workers (Prickering et al. 2008) between neuronal and non-neuronal responses. To note X-axe graduation correspond to 20 sec. Right panel. The proportion of cells displaying Type 1, 2 or 3 response was quantified in three independent experiments (n=9, N=3). n.s.= non-significant. Student-t test. B) Normalized fluorescence trace (mean  $\pm$  SEM) measured in APP<sup>+/+</sup> and APP<sup>-/-</sup> neurons upon perfusion for 150 sec with 50  $\mu$ M glutamate. The area under curve (AUC) was quantified for 50 neurons per coverslips. A total of 9 coverslips for each genotype was recorded in three independent experiments (N=3). The graph on the right shows AUC expressed as percentage of control (APP<sup>+/+</sup>). \*p=0,0106, Student's t-test.

## Supplemental Figure 6: GAD65 positive cells in neuronal cultures

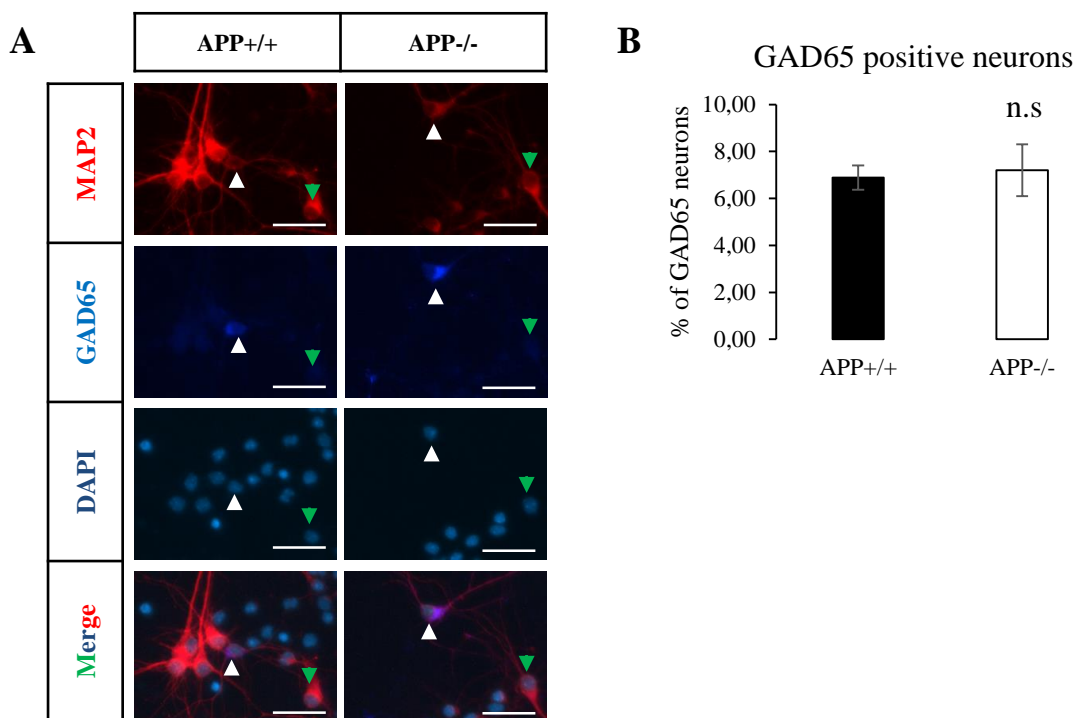

### **Figure S6: GAD65 positive neurons in primary cortical culture.**

**A)** Primary culture of cortical neurons after at DIV7. Cultures were immunostained with the neuron specific protein MAP2 (red), GAD65 (dark blue) and DAPI (light blue). Representative 20x micrographs show GAD65 positive neurons (white arrowhead) and GAD65 negative neuron (green arrowhead). **B)** Images (20x objective) were quantified (10 fields per coverslip for each genotype) in three independent cultures (n=30, N=3). Results (mean ± s.e.m) are expressed as percentage of GAD65+ MAP2+ cells (GAD65+ neurons) among all MAP2+ cells (neurons). n.s.= non-significant, Mann-Whitney test. Scale bar = 20µm.
